# Supplementary material for: A Record Chromophore Density in High‐Entropy Liquids of Two Low‐Melting Perylenes: A New Strategy for Liquid Chromophores
Source: PubMed Central journal article supplement (PMC6382313; doi:10.1002/advs.201801650), 2019-01-15
Supplement: ADVS-6-1801650-s001.pdf [file ADVS-6-1801650-s001.pdf]

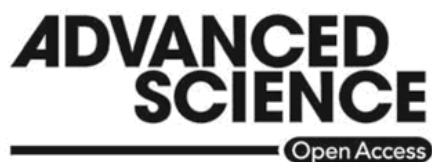

## Supporting Information

for *Adv. Sci.*, DOI: 10.1002/adv.201801650

A Record Chromophore Density in High-Entropy Liquids of Two Low-Melting Perylenes: A New Strategy for Liquid Chromophores

*Khushbu Kushwaha, Liyang Yu, Kati Stranius, Sandeep Kumar Singh, Sandra Hultmark, Muhammad Naeem Iqbal, Lars Eriksson, Eric Johnston, Paul Erhart, Christian Müller, and Karl Börjesson\**

## Supporting Information

### **Record chromophore density in a high-entropy liquid of two low-melting perylenes: A new strategy for liquid chromophores**

Khushbu Kushwaha, Liyang Yu, Kati Stranius, Sandeep Kumar Singh, Sandra Hultmark, Muhammad Naeem Iqbal, Lars Eriksson, Eric Johnston, Paul Erhart, Christian Müller and Karl Börjesson\*

#### *Table of Contents*

---

|    |                                                                            | Page  |
|----|----------------------------------------------------------------------------|-------|
| 1. | Spectroscopy                                                               | 2-3   |
| 2. | GIWAXS images of compounds <b>2d</b> , <b>2f</b> , <b>2j</b> and <b>2h</b> | 4     |
| 3. | Synthesis and characterization of compounds <b>2a-h</b>                    | 5-25  |
| 4. | Synthesis and characterization of compounds <b>2i-j</b>                    | 26-31 |
| 5. | Experiments related to mechanistic pathway                                 | 32-43 |
| 6. | Low temperature NMR for <b>2a</b>                                          | 44    |
| 7. | Single crystal X-ray of <b>2c</b>                                          | 45-48 |
| 8. | DSC of <b>2a:2d</b> and <b>2b:2d</b> mixtures                              | 49    |
| 9. | References                                                                 | 51    |

## 1. Spectroscopy

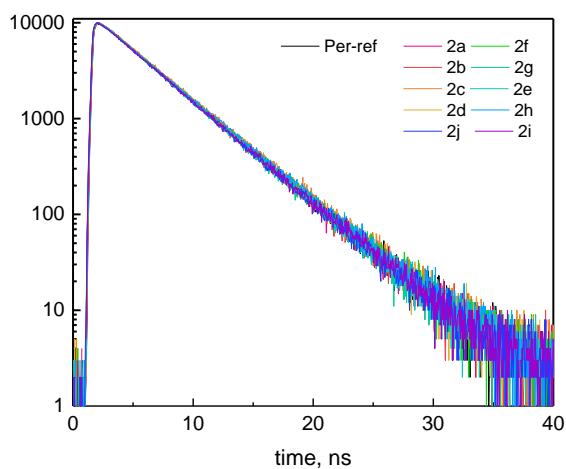

**Figure S1.** Fluorescence decays for compounds **2a-j** in cyclohexane, excited at 405 nm and monitored at the fluorescence maximum.

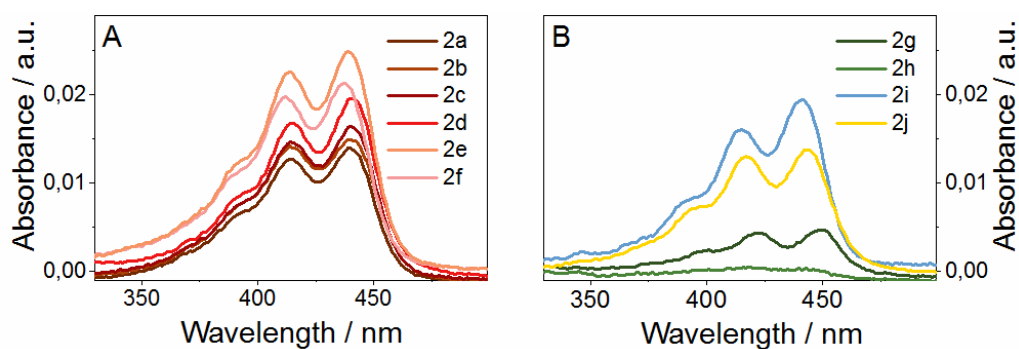

**Figure S2.** Absorbance spectra of pristine 1-alkylperylene (A) and 3- & 2-alkylperylene (B) films spin-coated on a glass plate using 1 mM solution in cyclohexane.

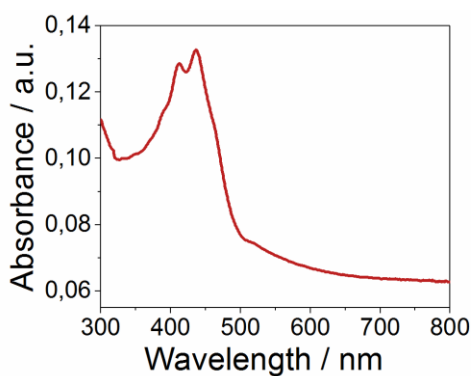

**Figure S3.** Absorption spectrum of pristine mixed sample (**2a:2b**; 1:1) film drop-coated on a glass plate.

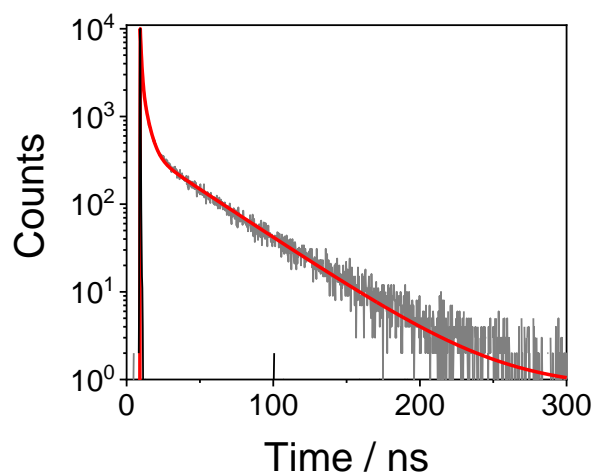

**Figure S4.** Emission decay at 530 nm of mixed film excited at 405 nm. Red line shows the 3-exponential fitting giving  $\tau_1=0.8$  ns,  $\tau_2=3.8$  ns and  $\tau_3=39$  ns.

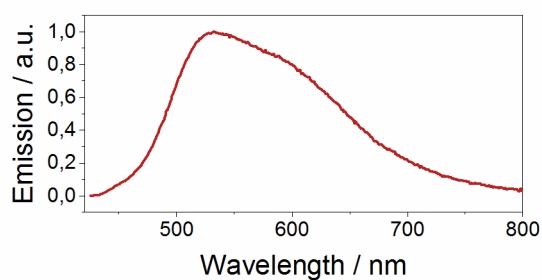

**Figure S5.** Emission spectrum of perylene blend (**2a:2b**; 1:1 wt:wt) drop-cast on a glass plate.

**Table S1. Quantum Yield for mixed sample 1:1 blend of 2a and 2b**

Measured QY for mixed film excited at 405 nm. QY were measured for mixed sample 4 times by turning the sample 90° between measurements. The reference (clean glass-plate) was measured 2 times by turning sample 180°.

|   | ref 1 | ref 2 |
|---|-------|-------|
| 1 | 25.26 | 26.33 |
| 2 | 18.14 | 17.91 |
| 3 | 18.99 | 18.94 |
| 4 | 23.34 | 24.16 |

## 2. GIWAXS images

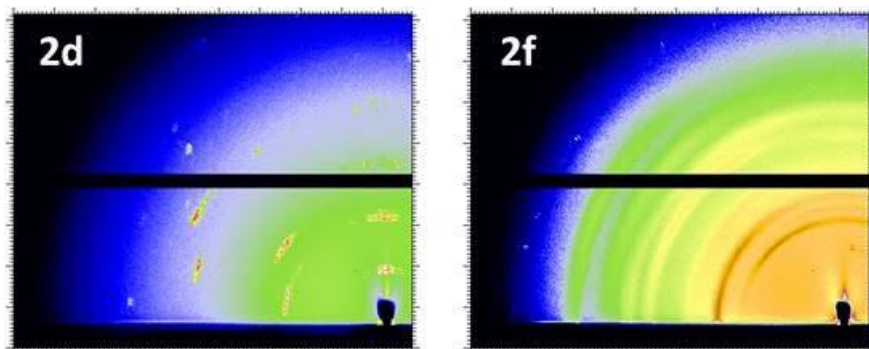

**Figure S6.** GIWAXS image of drop cast films containing **2d** and **2f**. The notable difference between these two images suggest distinguishable packing styles.

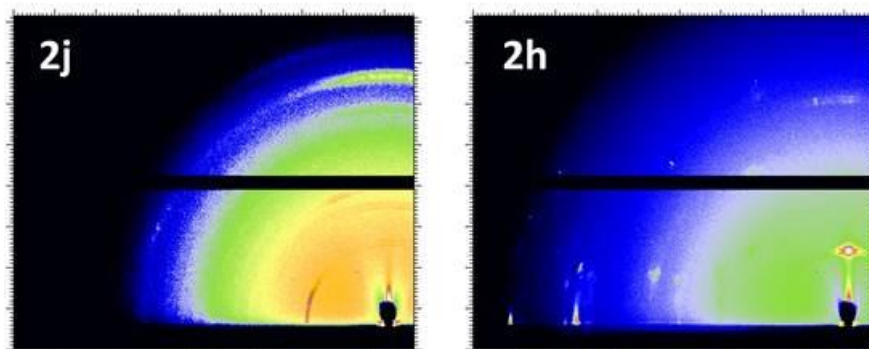

**Figure S7.** GIWAXS image of drop cast films containing **2j** and **2h**. The notable difference between these two images suggest distinguishable packing styles.

### 3. Synthesis and characterization of compounds 2a-h

**Methods and materials:** All alkyl lithium reagents were purchased from Sigma-Aldrich Chemical Co. Dry THF was obtained through solvent purifying machine (MBRAUN SPS 800) and used as such for carrying out reactions. Products were purified by column chromatography using basic alumina ( $\text{Al}_2\text{O}_3$ ) purchased from Merck.  $^1\text{H}$  ( $^{13}\text{C}$ ) NMR spectra were recorded at 400/500 (100/126) MHz on a Bruker spectrometer using  $\text{CDCl}_3$  as solvent.  $J$  values are given in Hertz (Hz) and chemical shifts are given in ppm. The  $^{13}\text{C}$  and  $^1\text{H}$  chemical shifts were referenced to residual solvent signals at  $\delta_{\text{C}}$  77.00 and  $\delta_{\text{H}}$  at 7.26 for  $\text{CDCl}_3$ . 2D Experiments (COSY, NOSEY, HSQC and HMBC) were carried out for some compounds (**2b** and **3a**) and data are given for supporting the structure of the final compounds. X-ray analysis data is provided for compound **2c**. GC-MS (Agilent 7820A, column HP-5MS 30 mm x 250  $\mu\text{m}$  x 0.25  $\mu\text{m}$ ) were recorded for all compounds. FT-IR (ATR) were carried out on Perkin-Elmer Frontier. For high resolution mass spectrometric analysis, all samples dissolved in DCM to approximately 1 mg/mL. Then 20  $\mu\text{L}$  of sample was dissolved in 1.5 mL of MeCN for injection. All samples were analyzed by APCI source in positive mode.

**General experimental procedure (I) for the synthesis of 1-alkylperylene (2a-h):** A schlenk flask was charged with Perylene (0.5 mmol-1.0 mmol, 1.0 equiv.), connected to a schlenk line and three vacuum/nitrogen cycles were performed. Then, dry THF was added to the flask preparing approximately 0.025 M solution, under nitrogen atmosphere and the temperature was reduced to  $-30\text{ }^\circ\text{C}$ . To this, alkyllithium (1.1-1.5 equiv.) was slowly added during 1.5 h and the temperature was maintained at  $-30\text{ }^\circ\text{C}$  for an additional 1 h. Afterwards, the reaction mixture was poured onto dry ice in small portions. The organic layer was separated, diluted with DCM, followed by washing with saturated  $\text{NH}_4\text{Cl}$  solution. The combined organic layer was dried using sodium sulphate, filtered and the filtrate was evaporated under vacuum. The crude product was purified by column chromatography on basic alumina using cyclohexane:toluene solvent system.

**General experimental procedure (II) for the synthesis of 1-alkylperylene (2a-h):** A schlenk flask was charged with Perylene (252 mg, 1.0 mmol), connected to a schlenk line and three vacuum/nitrogen cycles were performed. Then, dry THF (40 mL) was added to the flask, preparing approximately 0.025 M solution, under nitrogen atmosphere and the temperature was reduced to  $-30\text{ }^\circ\text{C}$ . To this, alkyllithium (1.1-1.5 equiv.) was slowly added during 1.5 h and the temperature was maintained at  $-30\text{ }^\circ\text{C}$  for an additional 1 h. Afterwards, reaction was quenched

with I<sub>2</sub> (3.0 equiv.) and continued to stir for 15 minutes. The contents was poured onto a saturated solution of sodium thiosulfate. The organic layer was separated, followed by washing with water. The combined organic layer was dried using sodium sulphate, filtered and the filtrate was evaporated under vacuum. The crude product was purified by column chromatography on basic alumina using cyclohexane:toluene solvent system.

### Synthesis of 2a in large amounts: upscaling of reaction

A two neck 250 mL round bottom flask was charged with Perylene (1.0 g, 4.0 mmol, 1.0 equiv.), and three vacuum/nitrogen cycles were performed. Then, 160 mL (approx.) of dry THF was added *via* cannula to the schlenk-flask under nitrogen and the temperature was reduced to -30 °C. To this, *n*-BuLi (2.3 mL, 5.1 mmol, 1.3 equiv.) was slowly added during 1.5 h and the temperature was maintained at -30 °C for an additional 1 h. Afterwards, reaction was quenched with I<sub>2</sub> (3.0 g, 3.0 equiv.) and continued to stir for 15 minutes. Followed by usual workup and column chromatography on basic alumina using cyclohexane:toluene (9:1) as an eluent 57 % (689 mg) of **2a** was obtained. Later fractions showed formation of 3-*n*-butylperylene, indicated by <sup>1</sup>H NMR but it could not be isolated in sufficient purity.

## 3. Synthesis and characterization of 2a-j

---

### 1-*n*-Butylperylene (2a)

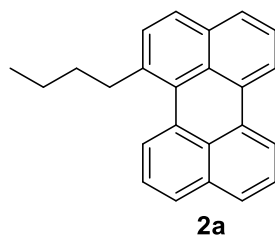

According to the general procedure (I), Perylene (**1a**) (126 mg, 0.5 mmol), *n*-BuLi (2.2 M in hexane, 0.65 mmol, 0.30 mL) were reacted in THF (20 mL) under nitrogen at -30 °C for 2.5 h. Aqueous work up with ammonium chloride solution followed by column chromatography using cyclohexane:toluene (9:1) as an eluent afforded 1-*n*-butylperylene (**2a**) as a yellow solid. mp (DSC): 63 °C (onset); Lit<sup>1</sup> 60-70 °C, yield (100 mg, 65%), R<sub>f</sub> = 0.48 in cyclohexane:toluene (9:1).

<sup>1</sup>H NMR (400 MHz, CDCl<sub>3</sub>): δ = 1.04 (t, 3H, *J* = 7.6 Hz, CH<sub>2</sub>CH<sub>2</sub>CH<sub>2</sub>CH<sub>3</sub>), 1.55 (sextet, overlapped with H<sub>2</sub>O peak, 2H, *J* = 7.6 Hz, CH<sub>2</sub>CH<sub>2</sub>CH<sub>2</sub>CH<sub>3</sub>), 1.95-1.91 (m, 2H, CH<sub>2</sub>CH<sub>2</sub>CH<sub>2</sub>CH<sub>3</sub>), 3.20-3.16 (m, 2H, CH<sub>2</sub>CH<sub>2</sub>CH<sub>2</sub>CH<sub>3</sub>), 7.56-7.46 (m, 4H), 7.76-7.65 (m, 4H),

7.87 (dd, 1H,  $J_1 = 7.6$  Hz,  $J_2 = 1.0$  Hz), 8.17 ( $2 \times$  dd, 2H,  $J_1 = 7.6$  Hz,  $J_2 = 1.2$  Hz).  $^{13}\text{C}$  NMR (100 MHz,  $\text{CDCl}_3$ ):  $\delta = 14.0$  ( $\underline{\text{C}}\text{H}_3$ ,  $n$ -Bu), 23.0 ( $\underline{\text{C}}\text{H}_2\text{CH}_3$ ,  $n$ -Bu), 33.2 (Ar- $\underline{\text{C}}\text{H}_2\text{CH}_2\text{CH}_2\text{CH}_3$ ), 35.7 (Ar- $\underline{\text{C}}\text{H}_2\text{CH}_2\text{CH}_2\text{CH}_3$ ), 120.0, 120.8, 125.6, 125.8, 126.2, 126.4, 127.0, 127.02, 127.2, 127.3, 129.5, 130.0, 130.7, 130.9, 131.1, 131.4, 132.6, 134.2, 138. IR (ATR  $\text{cm}^{-1}$ ):  $\nu = 3048$ , 2953, 2924, 2858, 820, 769. GC-MS (retention time = 13.01 min)  $m/z$ : 308 ( $\text{M}^+$ ), 293.1 ( $\text{M}^+ - \text{CH}_3$ ). HRMS (APCI):  $m/z$  calcd for  $(\text{C}_{24}\text{H}_{20} + \text{H})^+$ : 309.1638; found: 309.1642.

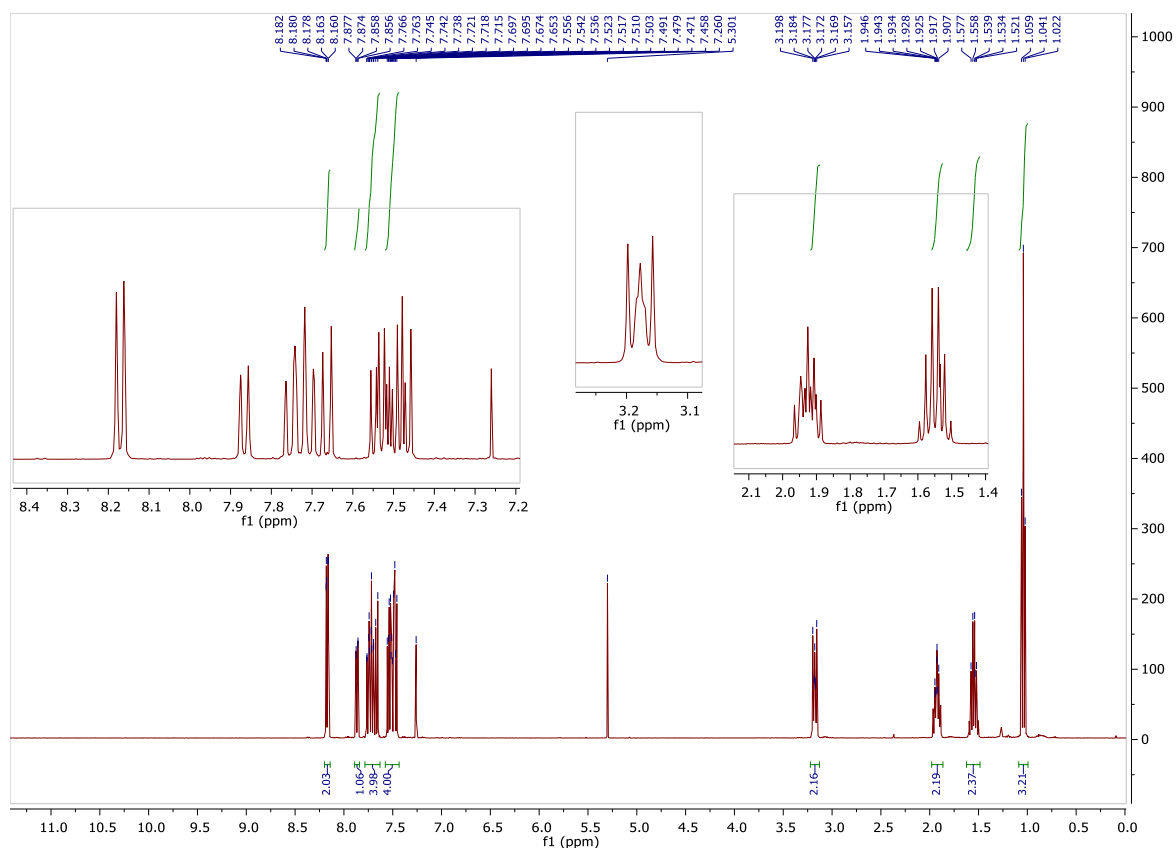



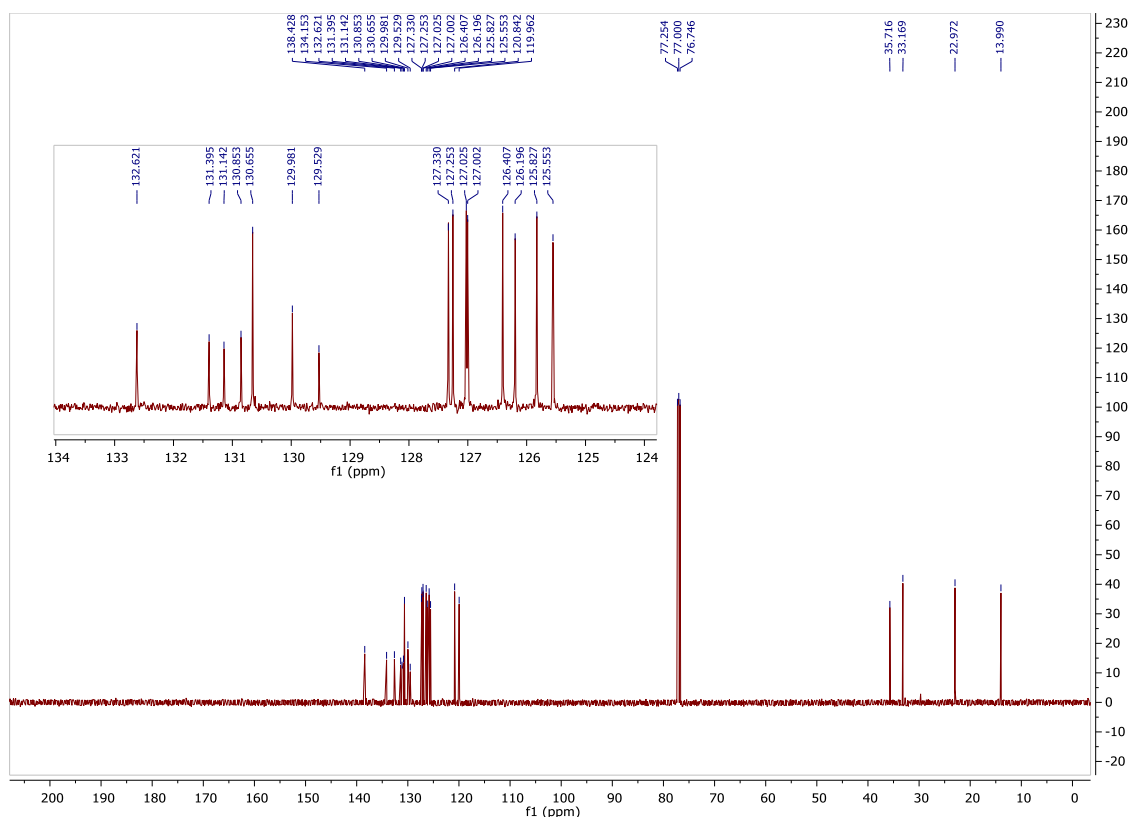

**Figure S8.**  $^1\text{H}$  (400 MHz) and  $^{13}\text{C}$  (100 MHz) NMR spectra of **2a** in  $\text{CDCl}_3$ .

### 1-Ethylperylene (**2b**)

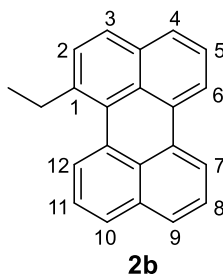

**According to the general procedure (I)**, Perylene (**1a**) (1.0 mmol, 252 mg), EtLi (0.5 M in benzene, 1.5 mmol, 3.0 mL) were reacted in THF (40 mL) under nitrogen at  $-30\text{ }^\circ\text{C}$  for 2.5 h. Aqueous work up with ammonium chloride solution followed by column chromatography using cyclohexane:toluene (9:1) as an eluent afforded 1-ethylperylene (**2b**) as a yellow solid. mp (DSC):  $78\text{ }^\circ\text{C}$  (onset); Lit<sup>1</sup>  $84\text{--}85\text{ }^\circ\text{C}$ , yield (64 mg, 23%).  $R_f = 0.46$  in cyclohexane:toluene (9:1).

**According to the general procedure (II)**, Perylene (**1a**) (1.0 mmol, 252 mg), EtLi (0.5 M in benzene, 1.5 mmol, 3.0 mL) were reacted in THF (40 mL) under nitrogen at  $-30\text{ }^\circ\text{C}$  for 2.5 h. Reaction was quenched with  $\text{I}_2$  (3.0 equiv.) followed by work up and column chromatography

using cyclohexane:toluene (9:1) as an eluent to afford 1-ethylperylene (**2b**) as a yellow solid. Yield (101 mg, 36%).

**<sup>1</sup>H NMR (500 MHz, CDCl<sub>3</sub>):**  $\delta$  = 1.55 (t, 2H,  $J$  = 7.6 Hz, CH<sub>2</sub>CH<sub>3</sub>), 3.23 (q, 3H,  $J$  = 7.6 Hz, CH<sub>2</sub>CH<sub>3</sub>), 7.55-7.47 (m, 4H, H-2, H-5, H-8, H-11), 7.76-7.67 (m, 4H, H-3, H-4, H-9, H-10), 7.89 (dd, 1H,  $J_1$  = 7.5 Hz,  $J_2$  = 1.0 Hz, H-12), 8.18 (dd, 2H,  $J_1$  = 7.5 Hz,  $J_2$  = 1.1 Hz, H-6, H-7). **<sup>13</sup>C NMR (126 MHz, CDCl<sub>3</sub>):**  $\delta$  = 15.6 (CH<sub>2</sub>CH<sub>3</sub>), 28.9 (CH<sub>2</sub>CH<sub>3</sub>), 120.0, 120.9, 125.6, 125.9, 126.2, 126.4, 127.05, 127.14, 127.25, 127.3, 129.5, 129.91, 129.97, 130.1, 130.9, 131.1, 131.3, 132.6, 134.1, 139.6. **IR (ATR cm<sup>-1</sup>):**  $\nu$  = 3053, 2958, 2930 (C-H), 822, 768. **GC-MS** (retention time = 11.599 min)  $m/z$ : 280.1 (M<sup>+</sup>). **HRMS (APCI):**  $m/z$ , calcd for (C<sub>22</sub>H<sub>16</sub>+H)<sup>+</sup>: 281.1325; found: 281.1336.

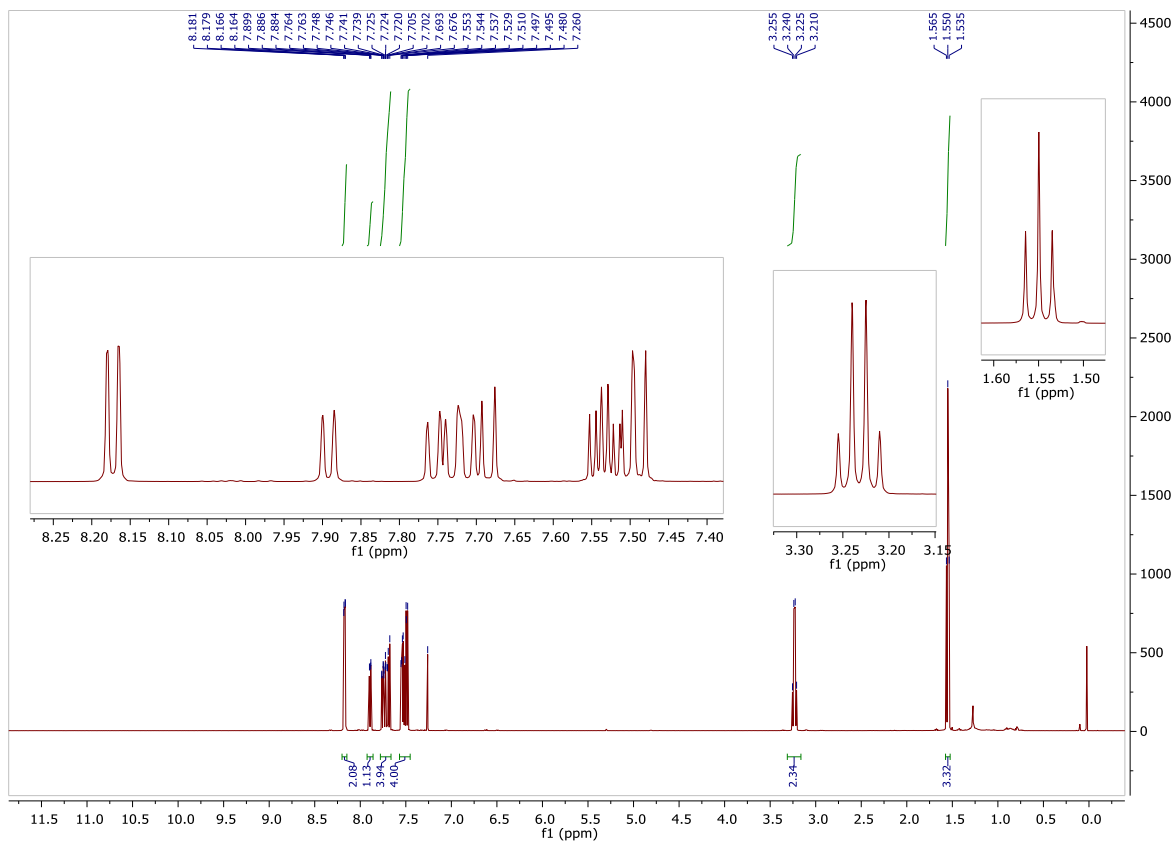

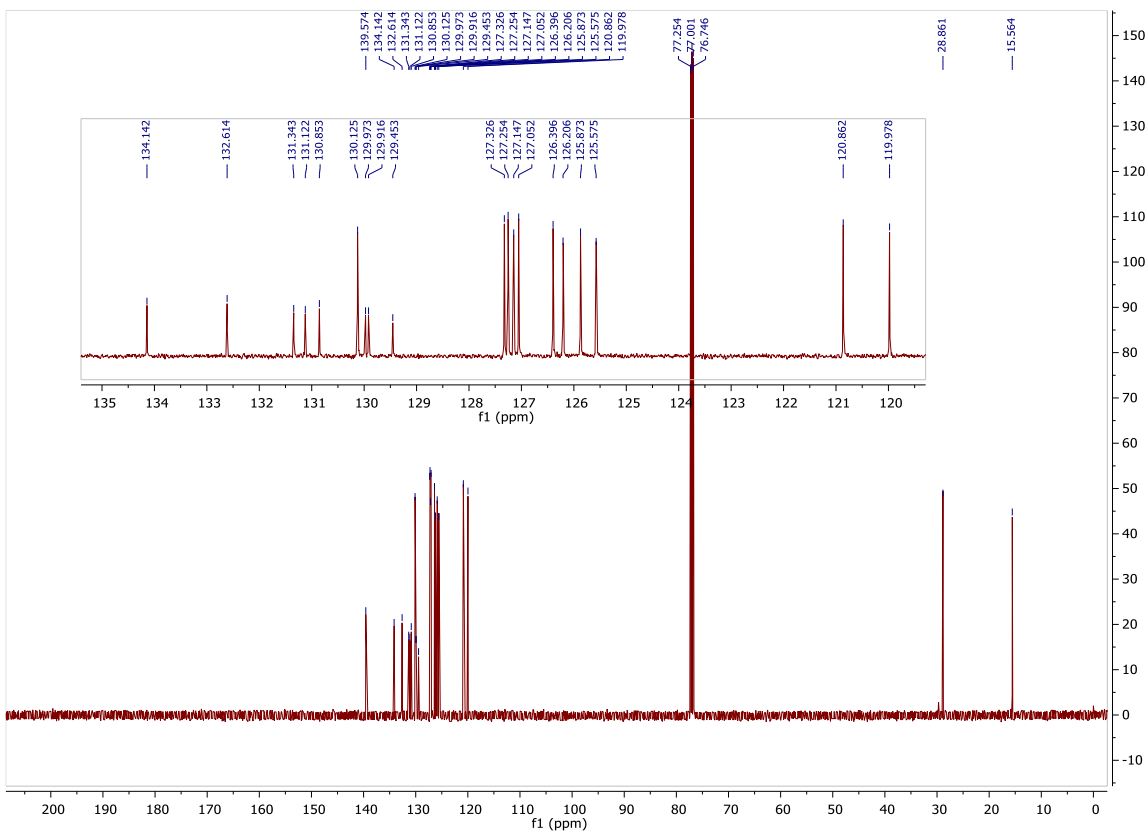

Figure S9.  $^1\text{H}$  (500 MHz) and  $^{13}\text{C}$  (126 MHz) NMR spectra of **2b** in  $\text{CDCl}_3$ .

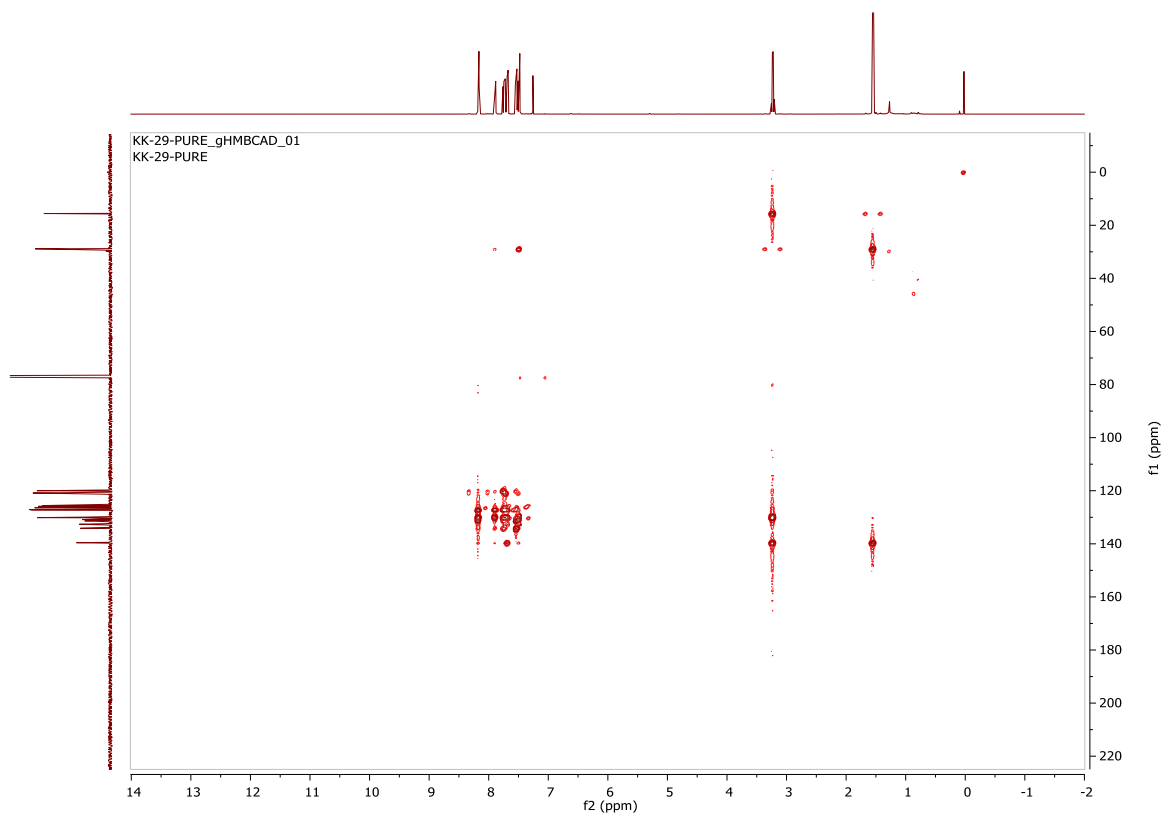

Figure S10. HMBC 2D NMR spectra of **2b** in  $\text{CDCl}_3$ .

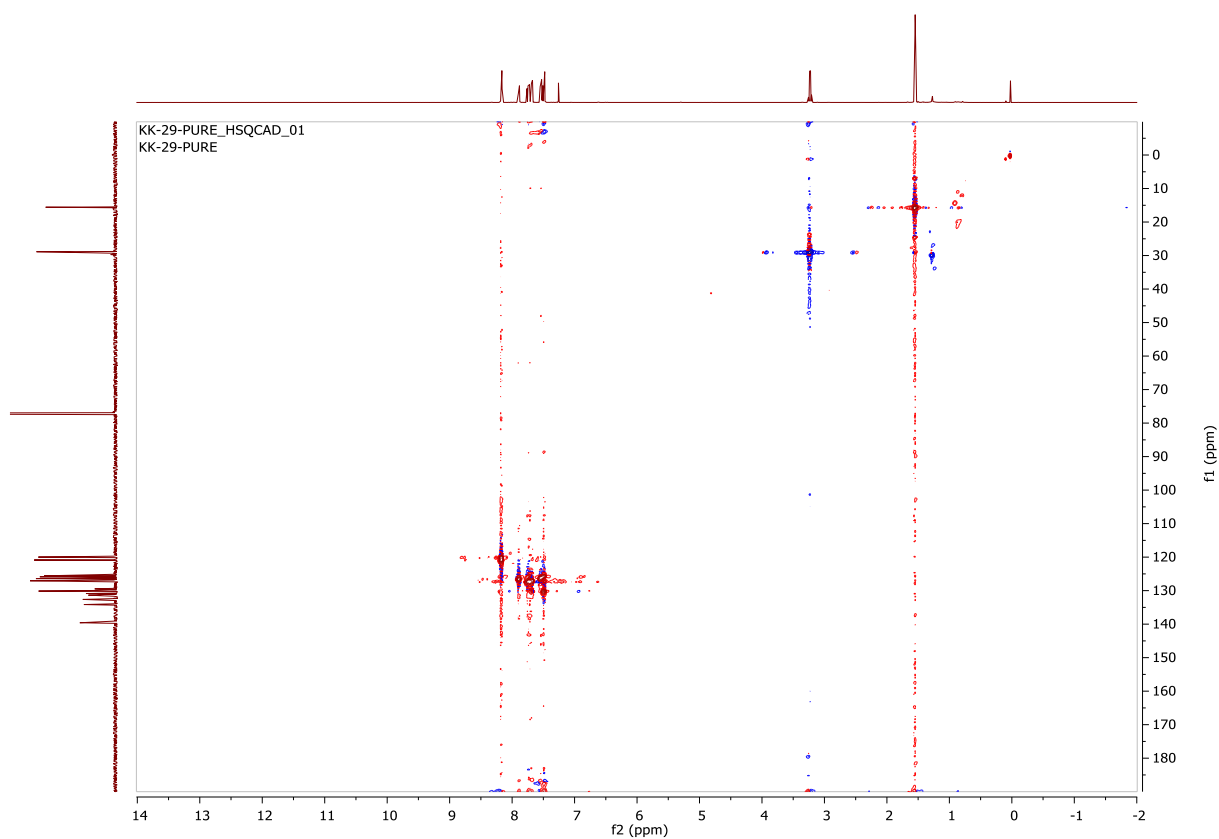

Figure S11. HSQC 2D NMR spectra of **2b** in  $\text{CDCl}_3$ .

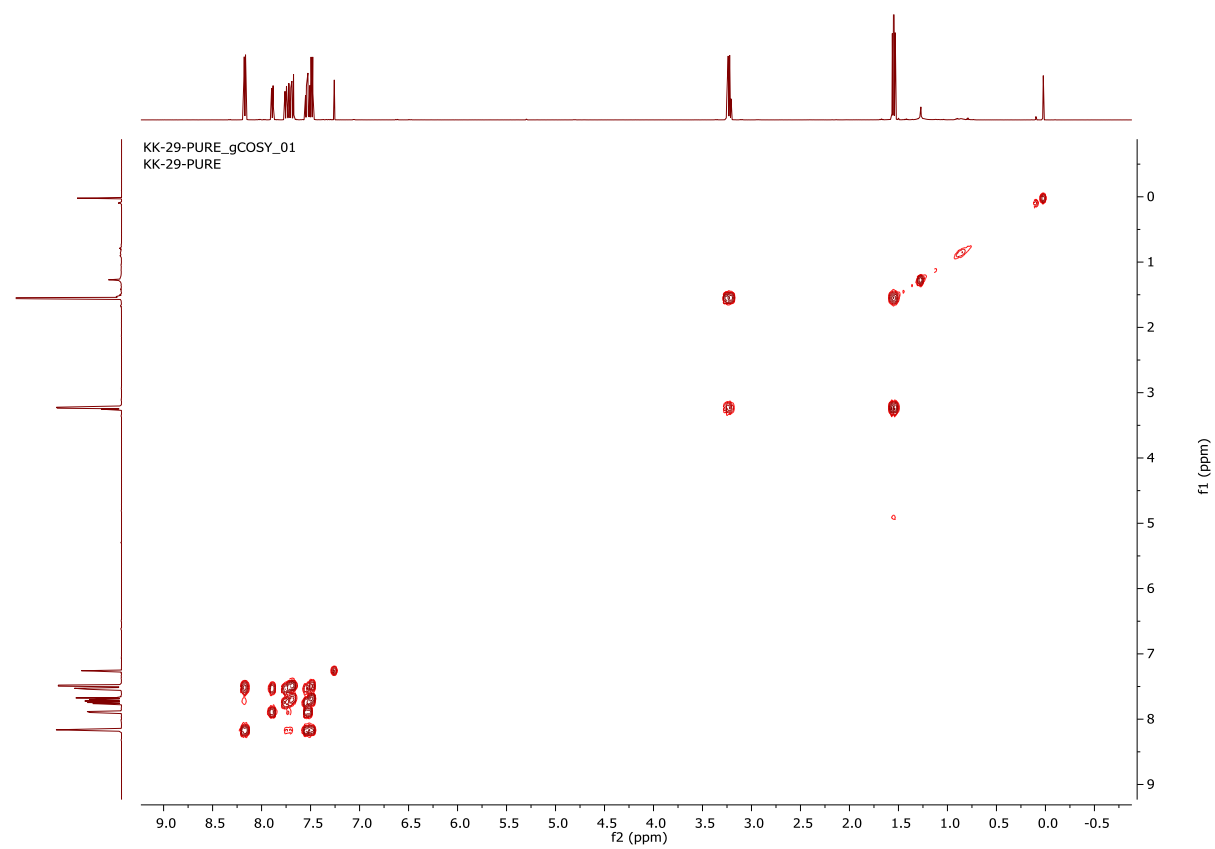

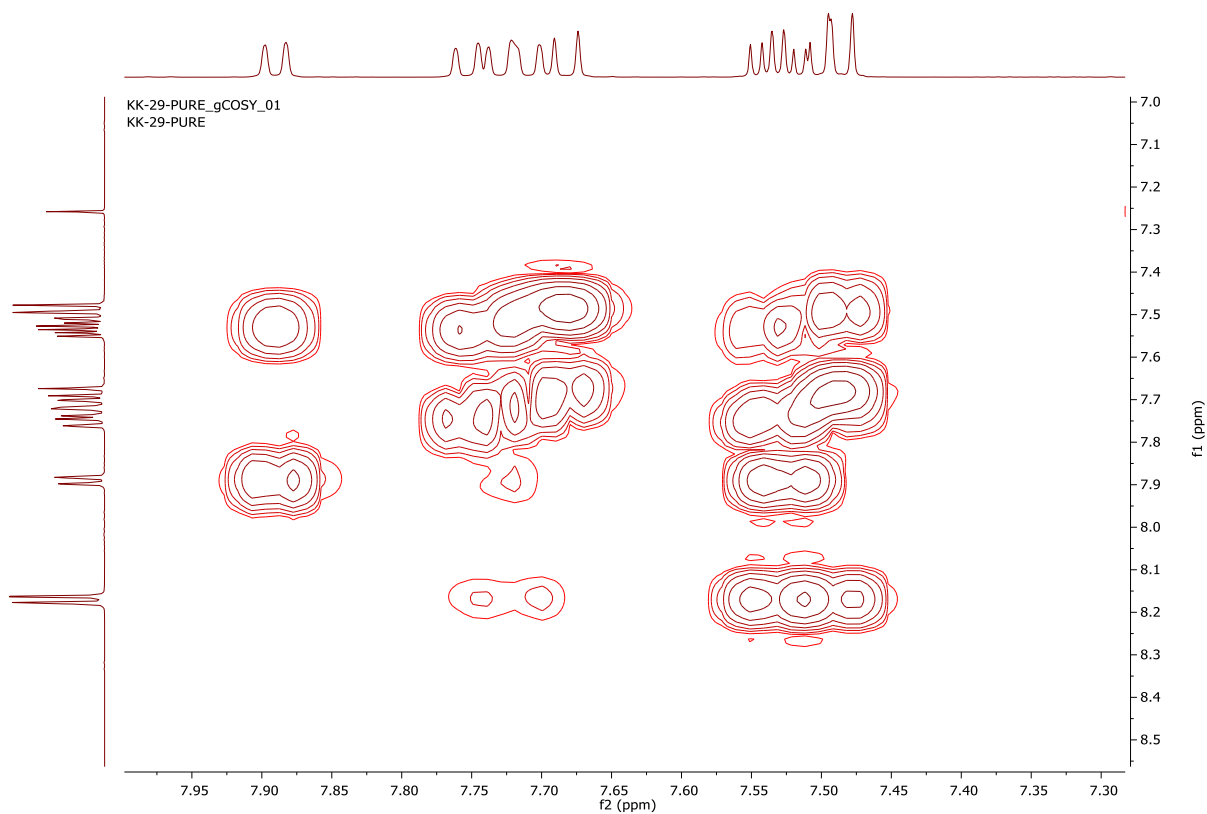

Figure S12. HSQC 2D NMR spectra of **2b** in  $\text{CDCl}_3$ .

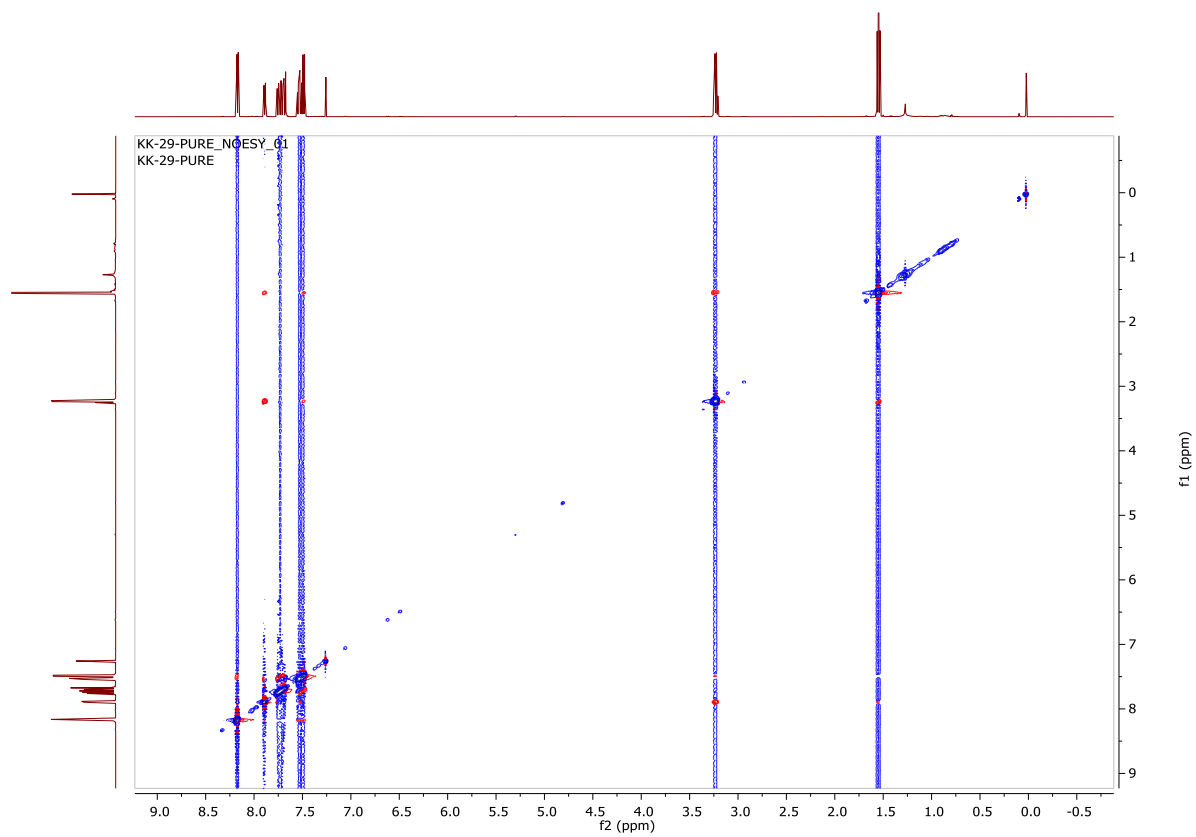

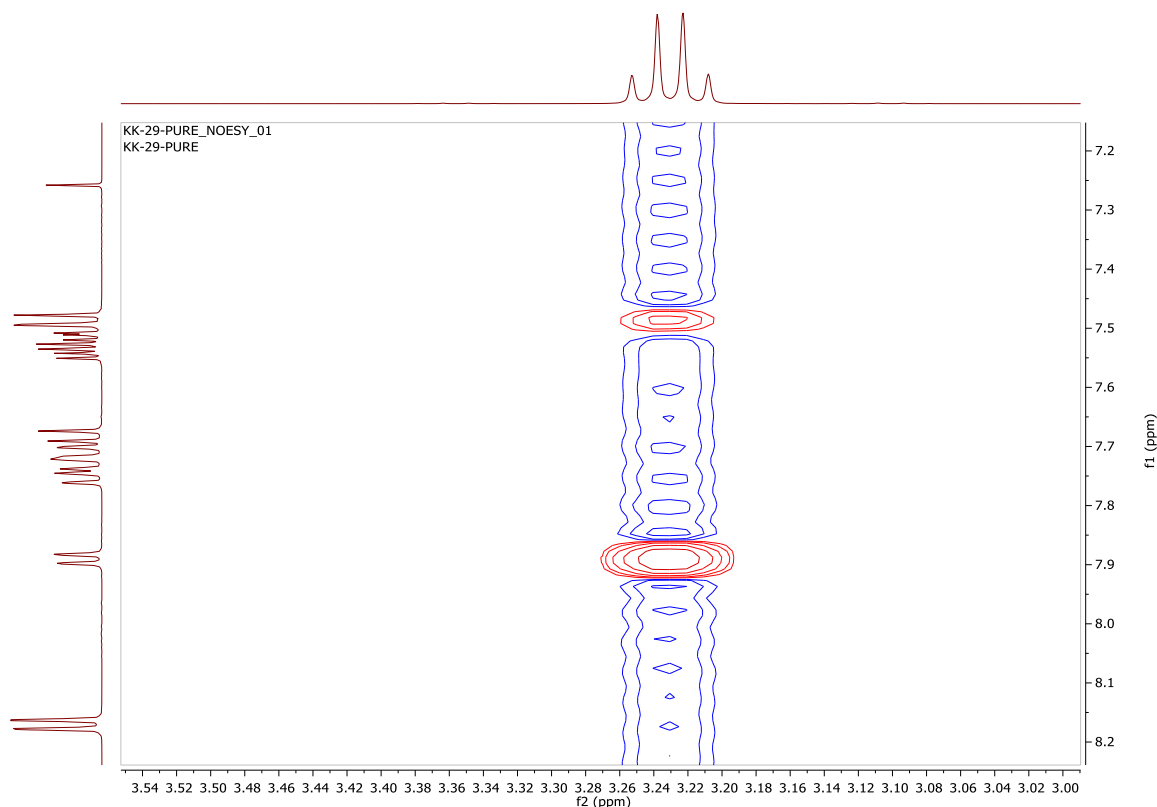

**Figure S13.** NOESY 2D NMR spectra of **2b** in  $\text{CDCl}_3$ .

### 1-*iso*-Butylperylene (**2c**)

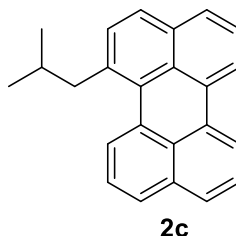

**According to the general procedure (I),**

Perylene (**1a**) (1.0 mmol, 252 mg), *iso*-BuLi (1.7 M in heptane, 1.2 mmol, 0.70 mL) were reacted in THF (40 mL) under nitrogen at  $-30\text{ }^\circ\text{C}$  for 2.5 h. Aqueous work up with ammonium chloride solution followed by column chromatography using cyclohexane:toluene (9:1) as an eluent afforded 1-*iso*-butylperylene (**2c**) as a yellow powder. mp (DSC):  $114\text{ }^\circ\text{C}$  (onset), yield (105 mg, 34%).  $R_f = 0.48$  in cyclohexane:toluene (9:1).

**According to the general procedure (II),** Perylene (**1a**) (1.0 mmol, 252 mg), *iso*-BuLi (1.7 M in heptane, 1.2 mmol, 0.70 mL) were reacted in THF (40 mL) under nitrogen at  $-30\text{ }^\circ\text{C}$  for 2.5 h. Reaction was quenched with  $\text{I}_2$  (3.0 equiv.) followed by work up and column chromatography using cyclohexane:toluene (9:1) as an eluent to afford 1-*iso*-butylperylene (**2c**) as a yellow solid. Yield (196 mg, 64%).

**$^1\text{H}$  NMR (400 MHz,  $\text{CDCl}_3$ ):** 0.95 (d, 6H,  $J = 6.8$  Hz,  $-\text{CH}(\text{CH}_3)_2$ , *i*-Bu), 2.21 (tp, 1H,  $J_1 = 13.4$  Hz,  $J_2 = 6.8$  Hz,  $-\text{CH}(\text{CH}_3)_2$ , *i*-Bu), 3.19 (d, 2H,  $J = 7.0$  Hz,  $-\text{CH}_2\text{CH}(\text{CH}_3)_2$ , *i*-Bu), 7.56-7.47 (m, 4H), 7.66 (d, 1H,  $J = 8.4$  Hz), 7.77-7.70 (m, 3H), 7.96 (dd, 1H,  $J_1 = 7.6$  Hz,  $J_2 = 1.0$  Hz), 8.17 (ddd, 2H,  $J_1 = 7.6$  Hz,  $J_2 = 2.4$  Hz,  $J_3 = 1.2$  Hz).  **$^{13}\text{C}$  NMR (100 MHz,  $\text{CDCl}_3$ ):**  $\delta = 22.7, 28.8, 45.2, 119.9, 120.8, 125.6, 125.7, 126.2, 126.8, 126.97, 126.98, 127.3, 130.0, 130.90, 130.91, 131.2, 131.5, 132.7, 134.1, 137.3$ . **IR (ATR  $\text{cm}^{-1}$ ):**  $\nu = 3051, 2953, 1591, 1464, 1364, 834, 813, 768$ . **GC-MS** (retention time = 11.859 min)  $m/z$ : 308.1 ( $\text{M}^+$ ), 265.1 ( $\text{M}^+ - \text{CH}(\text{CH}_3)_2$ ). **HRMS (APCI):**  $m/z$  calcd for  $(\text{C}_{24}\text{H}_{20}+\text{H})^+$ : 309.1645; found: 309.1638.

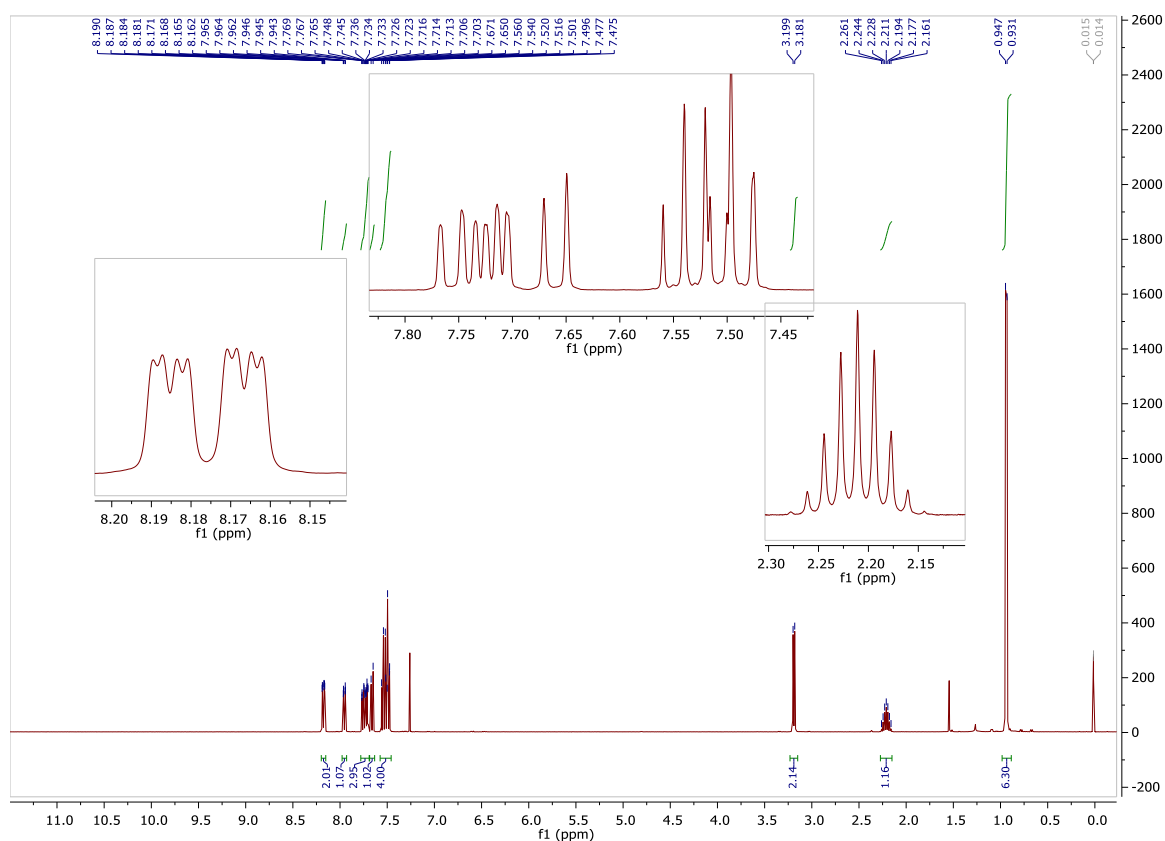

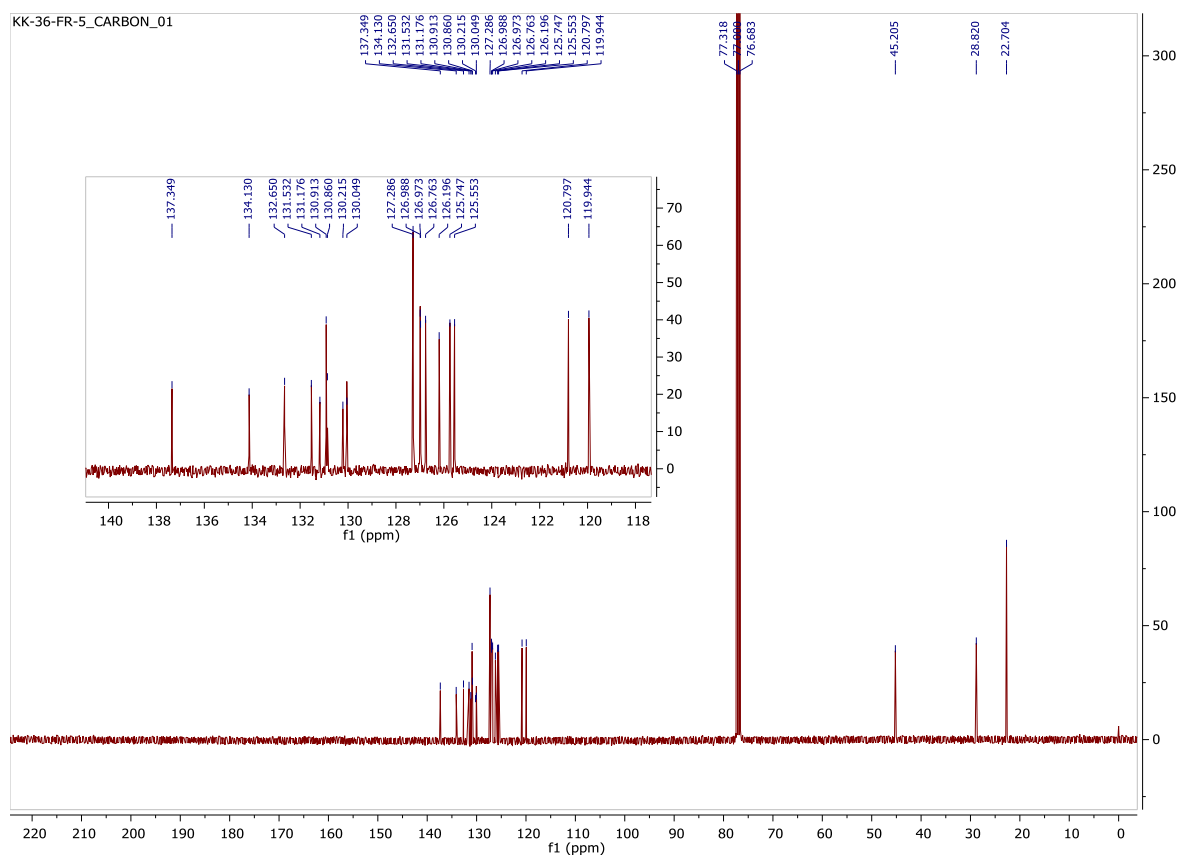

Figure S14.  $^1\text{H}$  (400 MHz) and  $^{13}\text{C}$  (100 MHz) NMR spectra of **2c** in  $\text{CDCl}_3$ .

### 1-*n*-Hexylperylene (**2d**)

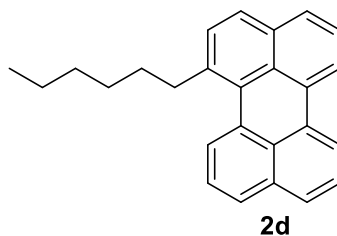

According to the general procedure I, Perylene (**1a**) (1.0 mmol, 252 mg), *n*-Hexyllithium (2.3 M in Hexane, 1.5 mmol, 0.65 mL) were reacted in THF (40 mL) under nitrogen at  $-30\text{ }^\circ\text{C}$  for 2.5 h. Aqueous work up with ammonium chloride solution followed by column chromatography using cyclohexane:toluene (9:1) as an eluent afforded 1-*n*-hexylperylene (**2d**) as a yellow-orange crystalline solid. mp (DSC):  $66\text{ }^\circ\text{C}$  (onset), yield (111 mg, 33%).  $R_f = 0.57$  in cyclohexane:toluene (9:1).

According to the general procedure II, Perylene (**1a**) (1.0 mmol, 252 mg), *n*-Hexyllithium (2.3 M in Hexane, 1.5 mmol, 0.65 mL) were reacted in THF (40 mL) under nitrogen at  $-30\text{ }^\circ\text{C}$  for 2.5 h. Reaction was quenched with  $\text{I}_2$  (3.0 equiv.) followed by work up and column



chromatography cyclohexane:toluene (9:1) as an eluent to afford 1-*n*-hexylperylene (**2d**) as an yellow-orange crystalline solid. Yield (207 mg, 62%).

**<sup>1</sup>H NMR (500 MHz, CDCl<sub>3</sub>):**  $\delta$  = 0.93 (t, 3H,  $J$  = 7.0 Hz, CH<sub>3</sub>, *n*-Hex), 1.44-1.33 (m, 4H, 2  $\times$  CH<sub>2</sub>, *n*-Hex), 1.55-1.49 (m, 2H, overlap with H<sub>2</sub>O peak, *n*-Hex), 1.96-1.89 (m, 2H, Ar-CH<sub>2</sub>CH<sub>2</sub>), 3.18-3.15 (m, 2H, Ar-CH<sub>2</sub>), 7.66 (d, 1H,  $J$  = 8.5 Hz), 7.73-7.69 (m, 2H), 7.75 (dd, 1H,  $J_1$  = 8.0 Hz,  $J_2$  = 1.0 Hz), 7.86 (dd, 1H,  $J_1$  = 7.5 Hz,  $J_2$  = 1.0 Hz), 8.18 (dd, 2H,  $J_1$  = 7.0 Hz,  $J_2$  = 1.0 Hz). **<sup>13</sup>C NMR (126 MHz, CDCl<sub>3</sub>):**  $\delta$  = 14.1, 22.7, 29.6, 31.0, 31.7, 36.1, 120.0, 120.9, 125.6, 125.9, 126.2, 126.4, 127.03, 127.01, 127.26, 127.3, 129.5, 130.0, 130.7, 130.9, 131.2, 131.4, 132.6, 134.2, 138.5. **IR (ATR cm<sup>-1</sup>):**  $\nu$  = 3052, 2955, 2928, 2855, 822, 769. **GC-MS** (retention time = 13.175 min)  $m/z$ : 336.2 (M<sup>+</sup>), 265.1 (M<sup>+</sup> - CH(CH<sub>3</sub>)<sub>2</sub>). **HRMS (APCI):**  $m/z$  calcd for (C<sub>26</sub>H<sub>24</sub>+H)<sup>+</sup>: 337.1951; found: 337.1962.

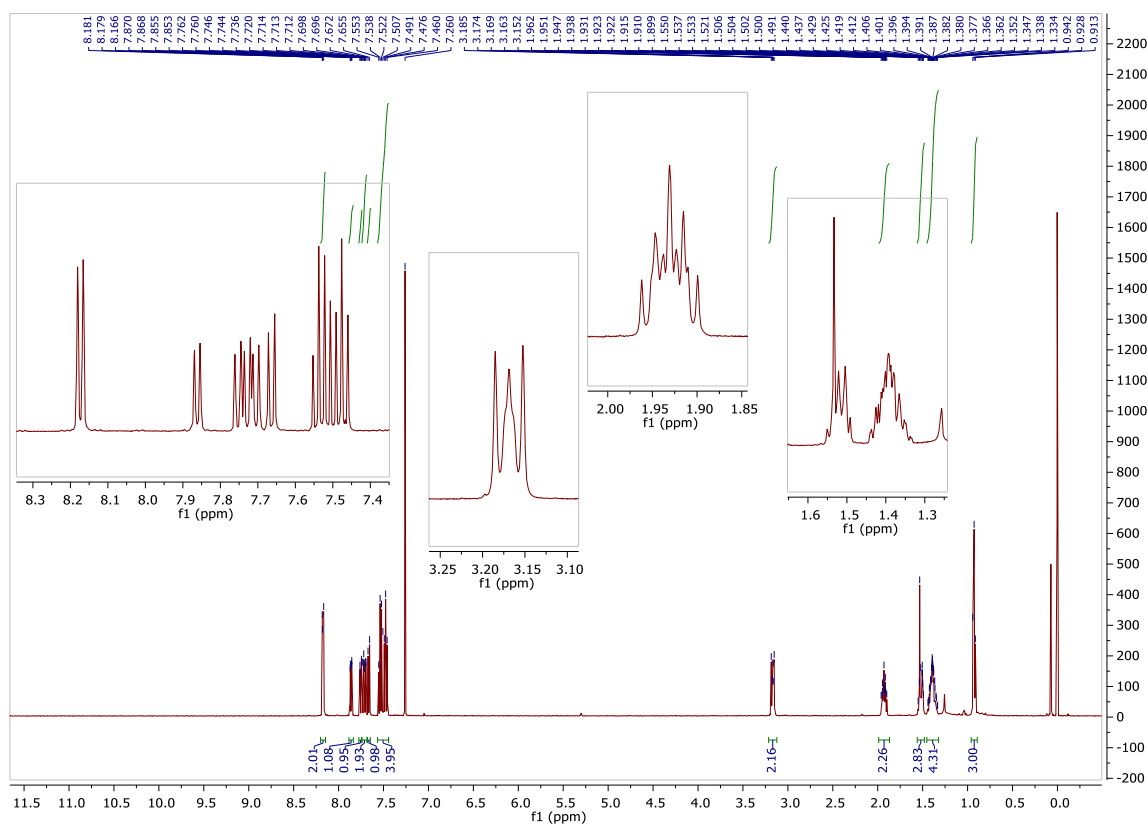

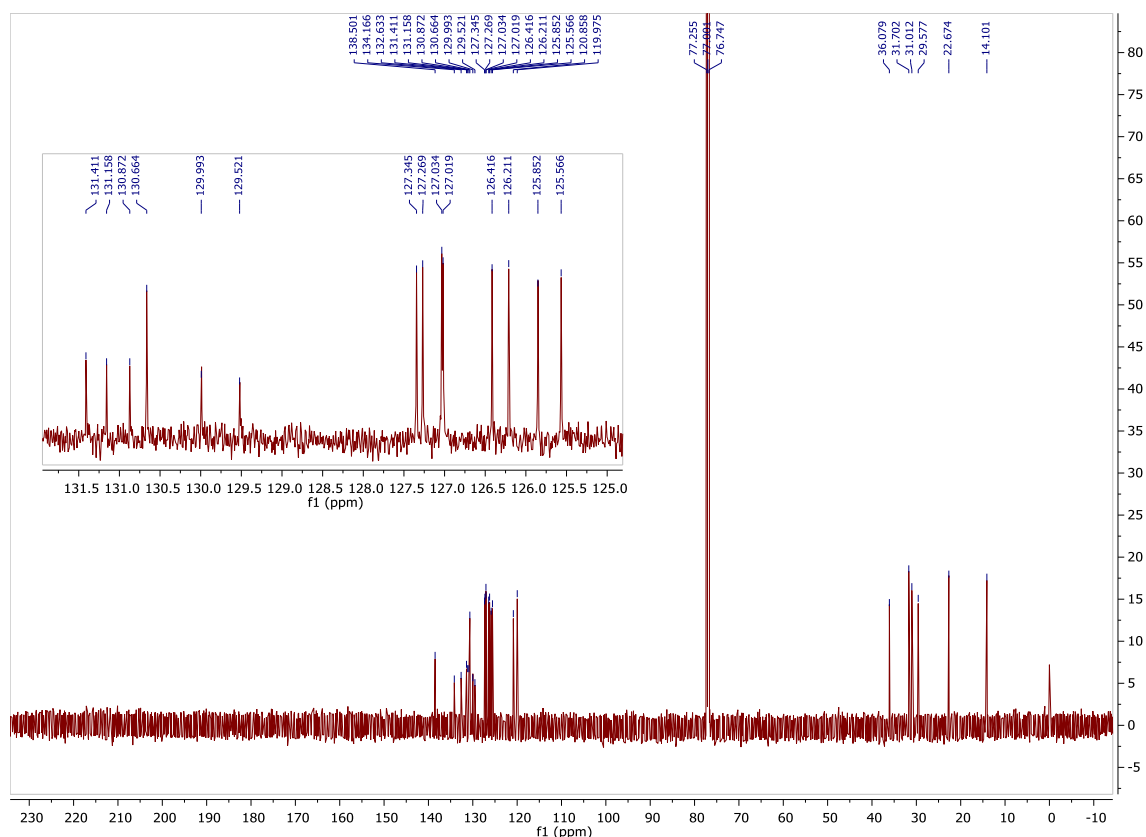

**Figure S15.**  $^1\text{H}$  (500 MHz) and  $^{13}\text{C}$  (126 MHz) NMR spectra of **2d** in  $\text{CDCl}_3$ .

### 1-*n*-(2-EthylHexyl)perylene (**2e**)

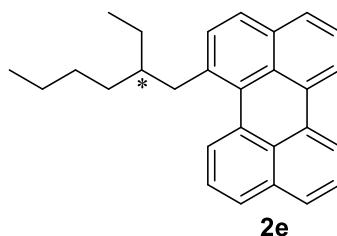

According to the general procedure II, Perylene (**1a**) (1.0 mmol, 252 mg), *n*-(2-ethylhexyl)lithium (30 weight percent in heptane, 1.5 mmol, 0.82 mL) were reacted in THF (40 mL) under nitrogen at  $-30\text{ }^\circ\text{C}$  for 2.5 h. Reaction was quenched with  $\text{I}_2$  (3.0 equiv.) followed by work up and column chromatography cyclohexane:toluene (9:1) as an eluent to afford 1-*n*-(2-ethylhexyl)perylene (**2e**) as a crystalline yellow solid. mp (DSC):  $50\text{ }^\circ\text{C}$  (onset), yield (189 mg, 52%).  $R_f = 0.58$  in cyclohexane:toluene (9:1).

$^1\text{H}$  NMR (400 MHz,  $\text{CDCl}_3$ ): 0.85-0.79 (m, 6H), 1.31-1.19 (m, 8H), 1.93-1.88 (m, 1H), 3.29 (d, 2H,  $J = 7.2$  Hz), 7.56-7.48 (m, 4H), 7.66 (d, 1H,  $J = 8.4$  Hz), 7.77-7.71 (m, 3H), 8.01 (dd, 1H,  $J_1 = 7.5$  Hz,  $J_2 = 1.0$  Hz), 8.17 (ddd, 2H,  $J_1 = 7.6$  Hz,  $J_2 = 1.2$  Hz).  $^{13}\text{C}$  NMR (100 MHz,  $\text{CDCl}_3$ ):  $\delta = 10.6, 14.1, 23.0, 25.7, 28.7, 32.7, 39.5, 40.2, 119.9, 120.8, 125.5, 125.7, 126.2,$

126.6, 126.9, 127.1, 127.2, 130.0, 130.03, 130.4, 130.8, 130.9, 131.2, 131.5, 132.5, 134.1, 137.6. **IR (ATR  $\text{cm}^{-1}$ ):**  $\nu = 2955, 2923, 2855, 1725, 1587, 1456, 1378, 1262, 1015, 804, 754, 735, 540$ . **GC-MS** (retention time = 12.753 min)  $m/z$ : 364.2 ( $\text{M}^+$ ), 265.1 ( $\text{M}^+ - \text{C}_7\text{H}_{15}$ ). **HRMS (APCI):**  $m/z$  calcd for  $(\text{C}_{24}\text{H}_{20}+\text{H})^+$ : 365.2264; found: 365.2265.

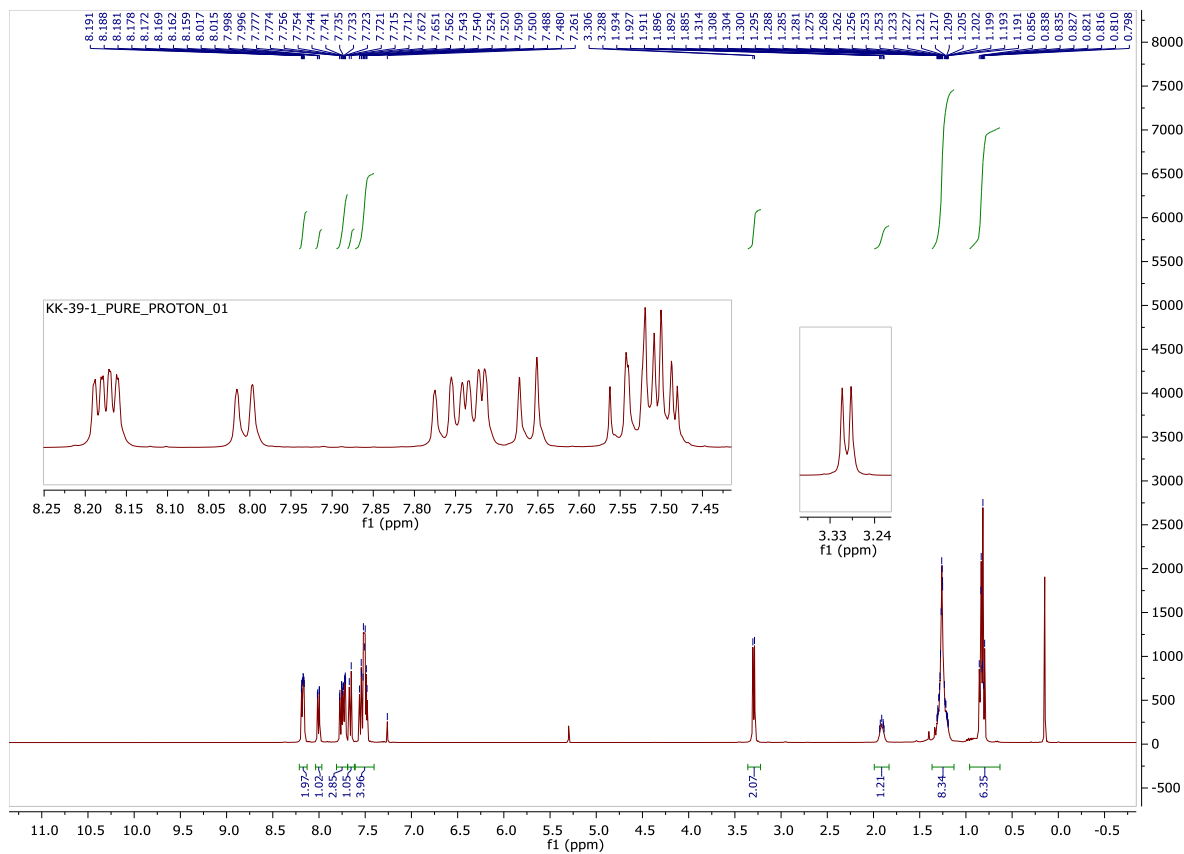

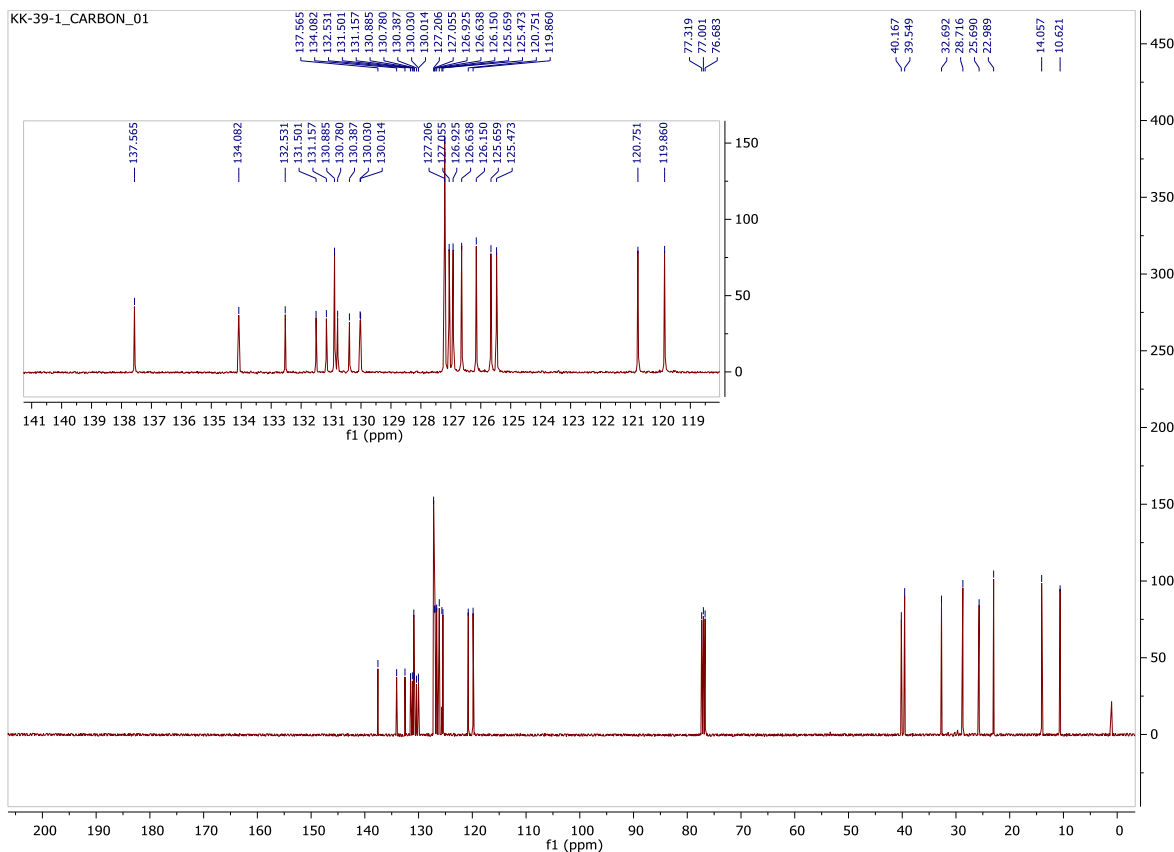

**Figure S16.**  $^1\text{H}$  (400 MHz) and  $^{13}\text{C}$  (100 MHz) NMR spectra of **2e** in  $\text{CDCl}_3$ .

### 1-*sec*-Butylperylene (**2f**)

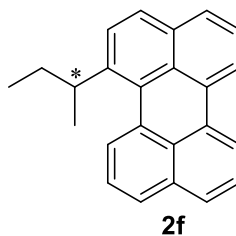

**According to the general procedure (I)**, Perylene (**1a**) (0.5 mmol, 126 mg), *s*-BuLi (1.4 M in cyclohexane, 0.60 mmol, 0.42 mL) were reacted in dry THF (20 mL) under nitrogen at  $-30\text{ }^\circ\text{C}$  for 2.5 h. Aqueous work up with ammonium chloride solution followed by column chromatography using cyclohexane:toluene (9:1) as an eluent afforded 1-*sec*-butylperylene (**2f**) as a yellow solid. mp (DSC):  $116\text{ }^\circ\text{C}$  (onset), yield (72 mg, 47%).  $R_f = 0.55$  in cyclohexane:toluene (9:1).

**$^1\text{H}$  NMR (500 MHz,  $\text{CDCl}_3$ ):** 1.52 (d, 3H,  $J = 6.5$  Hz), 1.73 (ddq, 2H,  $J_1 = 14.5$  Hz,  $J_2 = 6.5$  Hz,  $J_3 = 3.0$  Hz,  $\text{CH}_a\text{H}_b\text{CH}$ ), 3.73 (dq, 1H,  $\text{CH}_a\text{H}_b\text{CHCH}_3$ ,  $J_1 = 14.0$  Hz,  $J_2 = 7.0$  Hz), 7.56-7.48 (m, 4H), 7.72-7.69 (m, 2H), 7.73 (d, 1H,  $J = 8.0$  Hz), 7.76 (d, 2H,  $J = 8.0$  Hz), 8.16 (ddd, 2H,  $J_1 = 8.5$  Hz,  $J_2 = 7.5$  Hz,  $J_3 = 1.0$  Hz).  **$^{13}\text{C}$  NMR (126 MHz,  $\text{CDCl}_3$ ):**  $\delta = 12.2, 22.0, 32.0,$

37.3, 120.0, 120.9, 125.6, 125.8, 126.2, 126.5, 126.92, 126.94, 127.1, 127.3, 129.4, 129.7, 130.2, 130.8, 131.1, 131.2, 132.2, 134.1, 143.7. **IR (ATR  $\text{cm}^{-1}$ ):**  $\nu = 2957, 2923, 2870, 810, 764$ . **GC-MS** (retention time = 11.926 min)  $m/z$ : 308 ( $\text{M}^+$ ), 279.1 ( $\text{M}^+ - \text{CH}_2\text{CH}_3$ ). **HRMS (APCI):**  $m/z$  calcd for  $(\text{C}_{24}\text{H}_{20}+\text{H})^+$ : 309.1645; found: 309.1638.

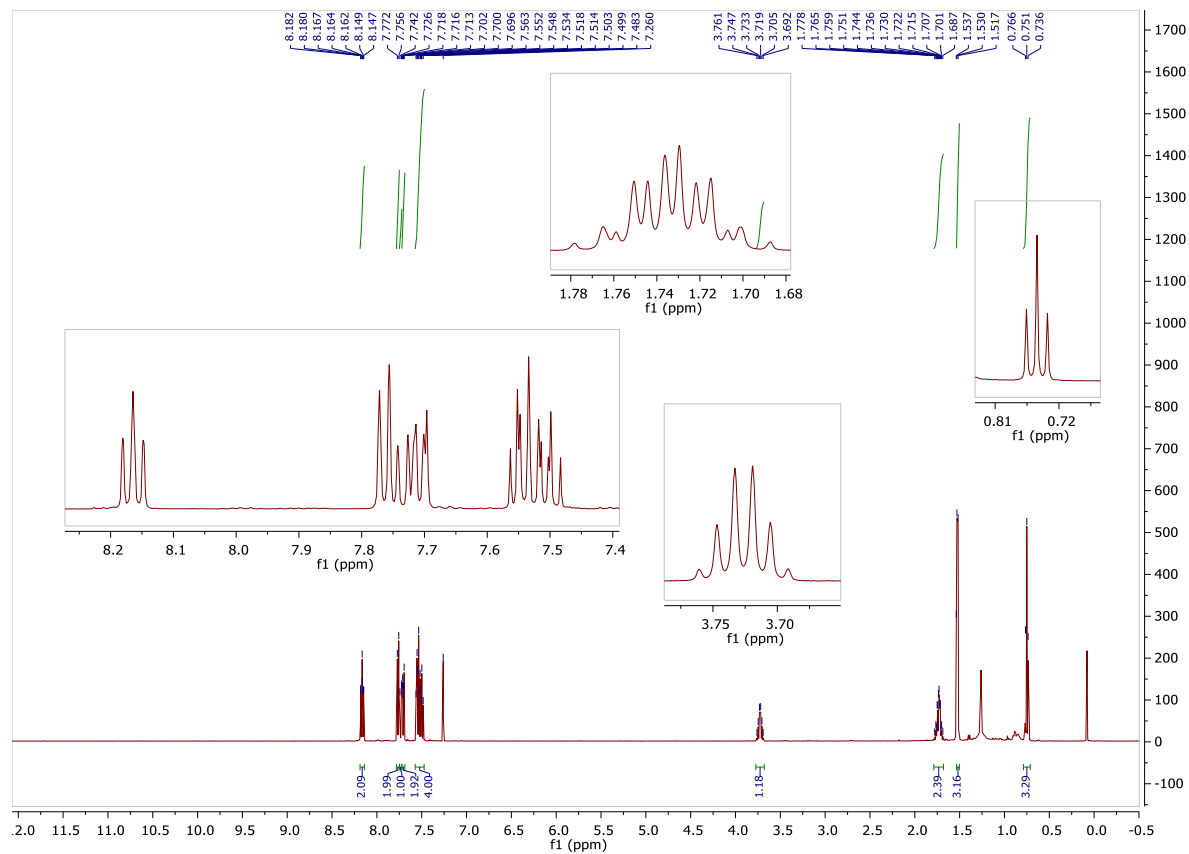

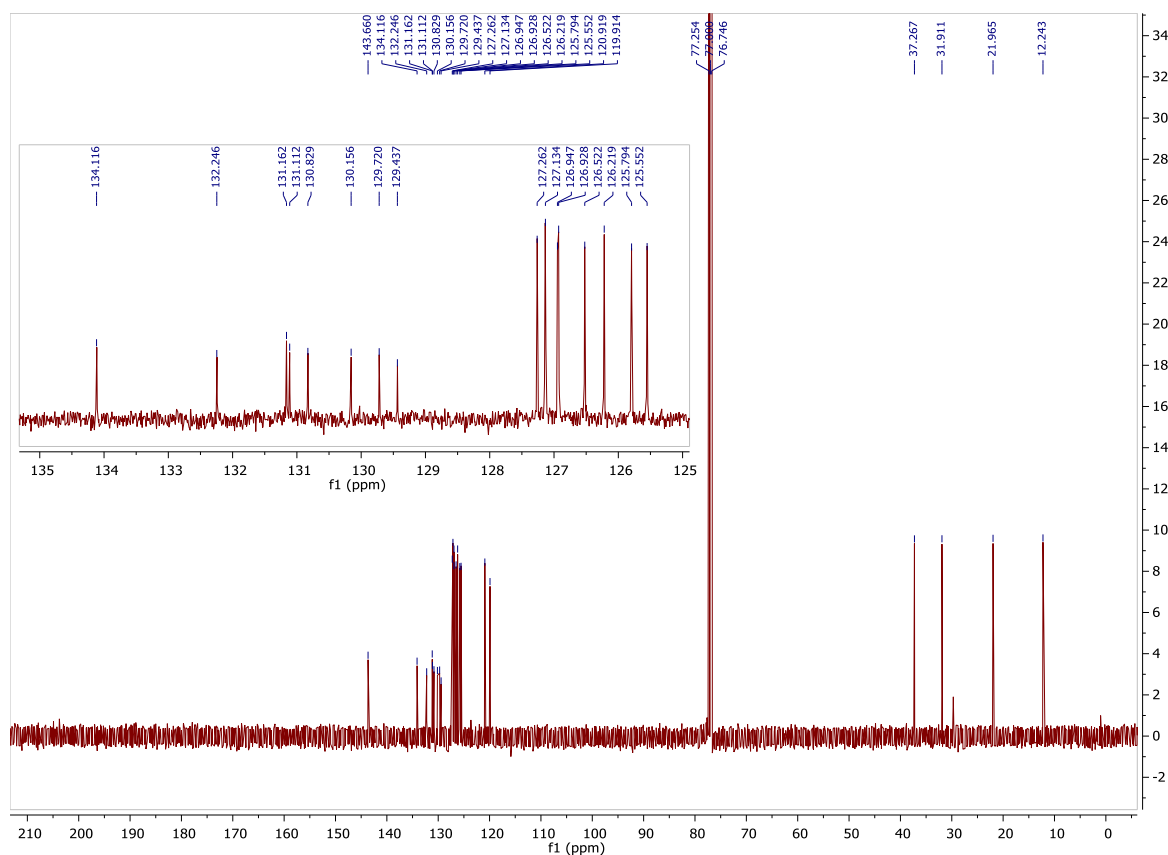

Figure S17.  $^1\text{H}$  (500 MHz) and  $^{13}\text{C}$  (126 MHz) NMR spectra of **2f** in  $\text{CDCl}_3$ .

### 3-*sec*-Butylperylene (**2g**)

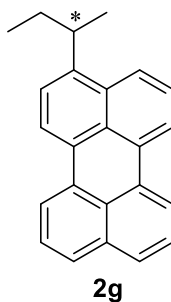

Elutions using cyclohexane:toluene (85:15) afforded 3-*sec*-butylperylene (**2g**) as a yellow solid. mp (DSC): 131 °C (Peak), yield (20 mg, 13%).  $R_f = 0.48$  in cyclohexane:toluene (9:1).

$^1\text{H}$  NMR (500 MHz,  $\text{CDCl}_3$ ):  $\delta = 0.96$  (t, 3H,  $J = 7.5$  Hz,  $\text{CH}_a\text{H}_b\text{CH}_3$ , *s*-Bu), 1.39 (d, 3H,  $\text{CH}_3\text{CH}$ , *s*-Bu), 1.75 (dq, 1H,  $J_1 = 14.5$  Hz,  $J = 7.0$  Hz,  $\text{CH}_a\text{H}_b\text{CH}_3$ ), 1.87 (dq, 1H,  $J_1 = 14.0$  Hz,  $J = 7.5$  Hz,  $\text{CH}_a\text{H}_b\text{CH}_3$ ), 3.45 (dq, 1H,  $\text{CH}_3\text{CHCH}_a\text{H}_b$ ,  $J_1 = 14.0$  Hz,  $J = 7.0$  Hz), 7.41 (d, 1H,  $J = 8.0$  Hz), 7.47 (td, 2H,  $J_1 = 8.0$  Hz,  $J_2 = 1.5$  Hz), 7.51 (dd, 1H,  $J_1 = 8.5$  Hz,  $J_2 = 7.5$  Hz), 7.65 (t, 2H,  $J = 8.5$  Hz), 7.98 (d, 1H,  $J = 8.5$  Hz), 8.16 (dd, 1H,  $J_1 = 7.5$  Hz,  $J_2 = 1.0$  Hz), 8.18 (dd, 2H,  $J_1 = 7.5$  Hz,  $J_2 = 1.5$  Hz), 8.21 (dd, 1H,  $J_1 = 7.5$  Hz,  $J_2 = 1.0$  Hz).  $^{13}\text{C}$  NMR (126 MHz,  $\text{CDCl}_3$ ):  $\delta = 12.2, 21.0, 30.4, 35.5, 119.6, 120.0, 120.1, 120.3, 123.2, 123.3, 126.2, 126.5, 126.6,$

127.2, 127.6, 128.5, 129.0, 129.1, 131.5, 131.6, 131.8, 133.0, 134.6, 143.7. **IR (ATR  $\text{cm}^{-1}$ ):**  $\nu$  = 3053, 2961, 2925, 822, 770. **GC-MS** (retention time = 12.93 min)  $m/z$ : 308 ( $M^+$ ), 279.1 ( $M^+ - C_2H_5$ ). **HRMS (APCI):**  $m/z$  calcd for  $(C_{24}H_{20}+H)^+$ : 309.1638; found: 309.1643.

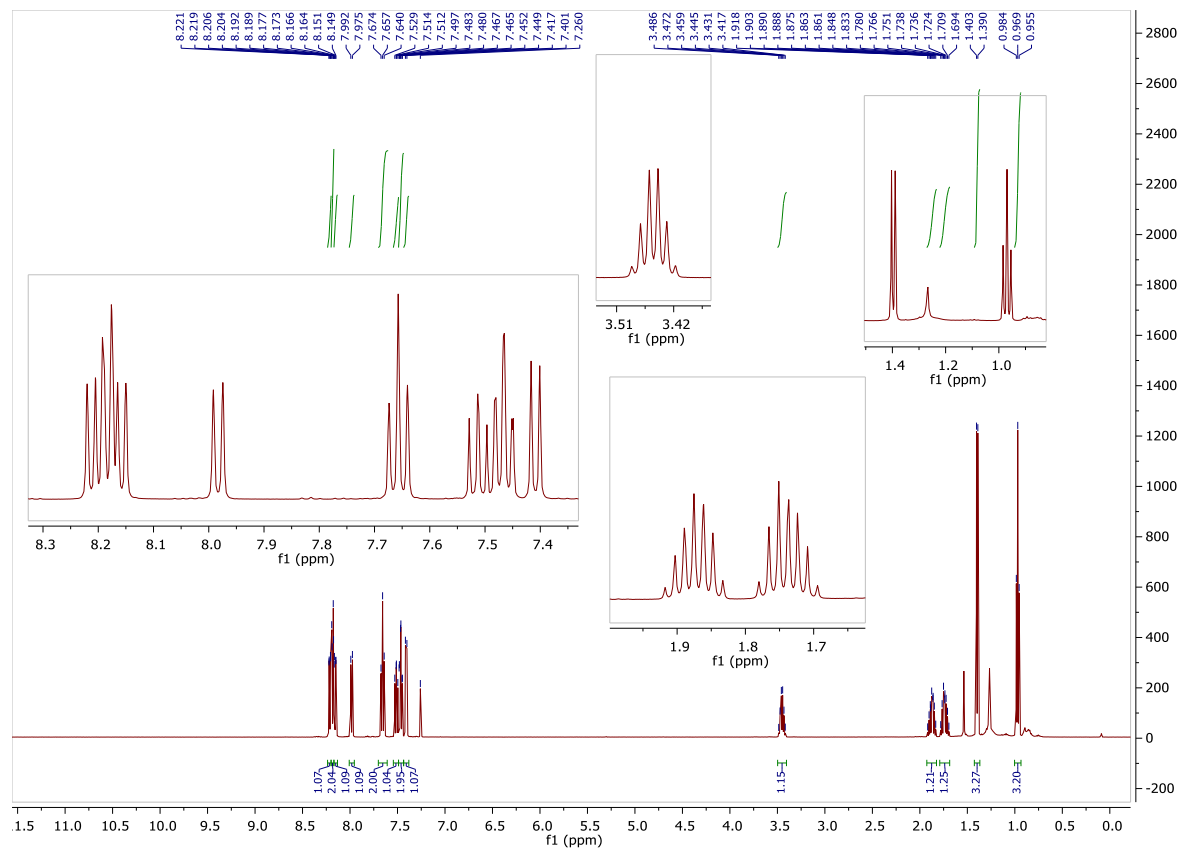

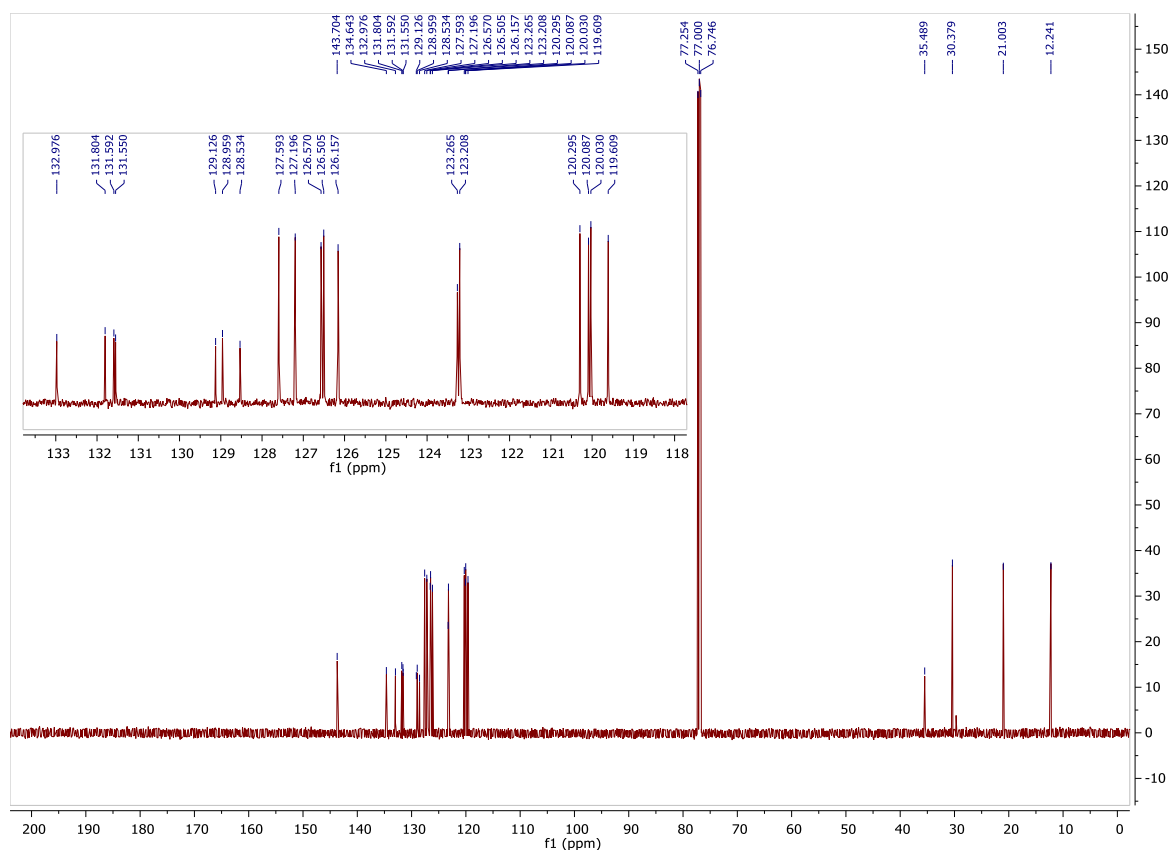

Figure S18.  $^1\text{H}$  (500 MHz) and  $^{13}\text{C}$  (126 MHz) NMR spectra of **2g** in  $\text{CDCl}_3$ .

### 3-*tert*-butylperylene (**2h**)

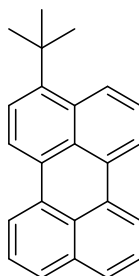

**2h**

According to the general procedure (I), Perylene (**1a**) (0.5 mmol, 126 mg), 3-*tert*-BuLi (1.9 M in pentane, 0.65 mmol, 0.32 mL) were reacted in THF (20 mL) under nitrogen at  $-30\text{ }^\circ\text{C}$  for 2.5 h. Aqueous work up with ammonium chloride solution followed by column chromatography using cyclohexane:toluene (88:12) as an eluent afforded 3-*tert*-butylperylene (**2h**) as a yellow solid. mp (DSC):  $217\text{ }^\circ\text{C}$  (onset); yield (14 mg, 9%).  $R_f = 0.46$  in cyclohexane:toluene (9:1).

$^1\text{H}$  NMR (400 MHz,  $\text{CDCl}_3$ ):  $\delta = 1.65$  (s, 9H,  $3 \times \text{CH}_3$ , *t*-Bu), 7.52-7.45 (m, 3H), 7.67 (dd, 1H,  $J_1 = 7.6\text{ Hz}$ ,  $J_2 = 0.8\text{ Hz}$ ), 8.18 (ddd, 2H,  $J_1 = 8.4\text{ Hz}$ ,  $J_2 = 7.5\text{ Hz}$ ,  $J_3 = 1.1\text{ Hz}$ ), 8.22 (dd, 1H,  $J_1 = 7.6\text{ Hz}$ ,  $J_2 = 0.8\text{ Hz}$ ), 8.33 (dd, 1H,  $J_1 = 8.8\text{ Hz}$ ,  $J_2 = 1.2\text{ Hz}$ ).  $^{13}\text{C}$  NMR (100 MHz,



**CDCl<sub>3</sub>**):  $\delta$  = 31.8 (C(CH<sub>3</sub>)<sub>3</sub>), 36.0 (C(CH<sub>3</sub>)<sub>3</sub>), 119.7, 119.8, 120.07, 120.09, 124.1, 125.0, 126.57, 126.59, 126.9, 127.3, 127.5, 128.3, 129.6, 130.1, 131.4, 131.7, 132.8, 134.5, 146.0. **IR** (ATR cm<sup>-1</sup>):  $\nu$  = 2956, 2921, 808, 766. **GC-MS** (retention time = 13.01 min)  $m/z$ : 308 (M<sup>+</sup>), 293.1 (M<sup>+</sup>-CH<sub>3</sub>). **HRMS (APCI)**:  $m/z$  calcd for (C<sub>24</sub>H<sub>20</sub>+H)<sup>+</sup>: 309.1638; found: 309.1641.

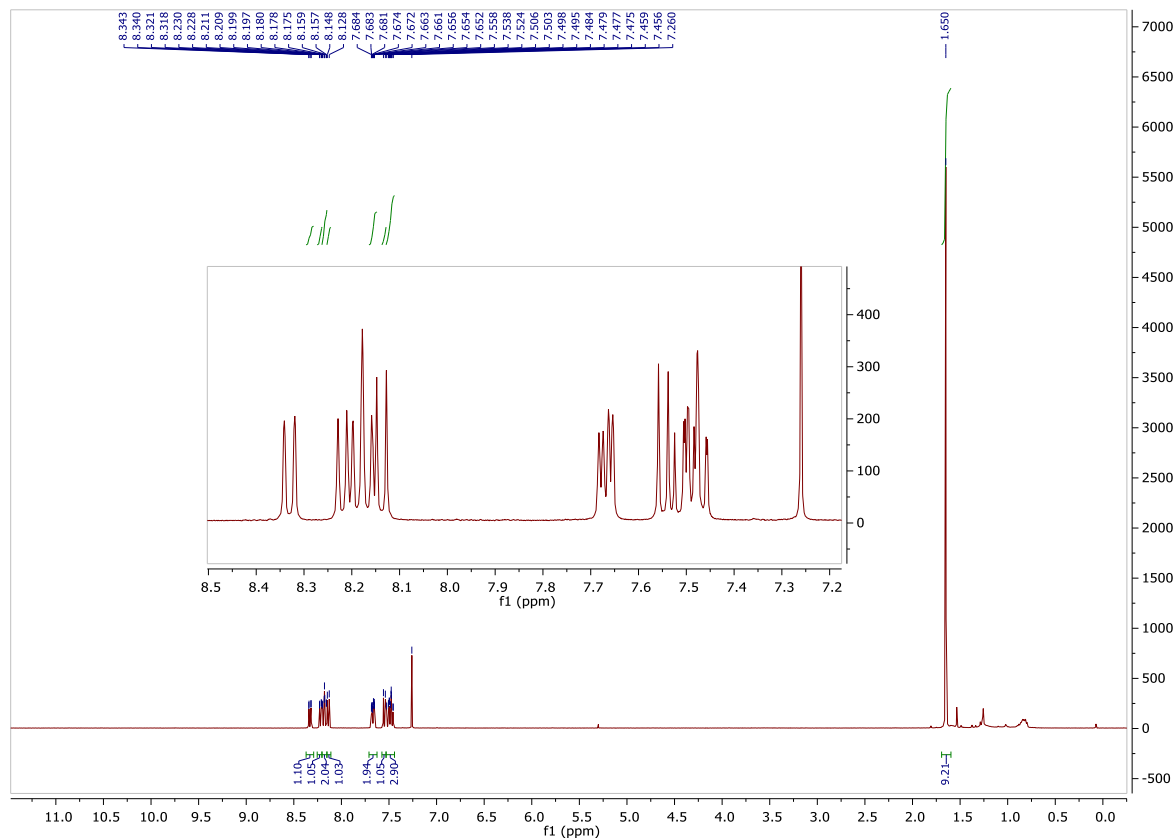

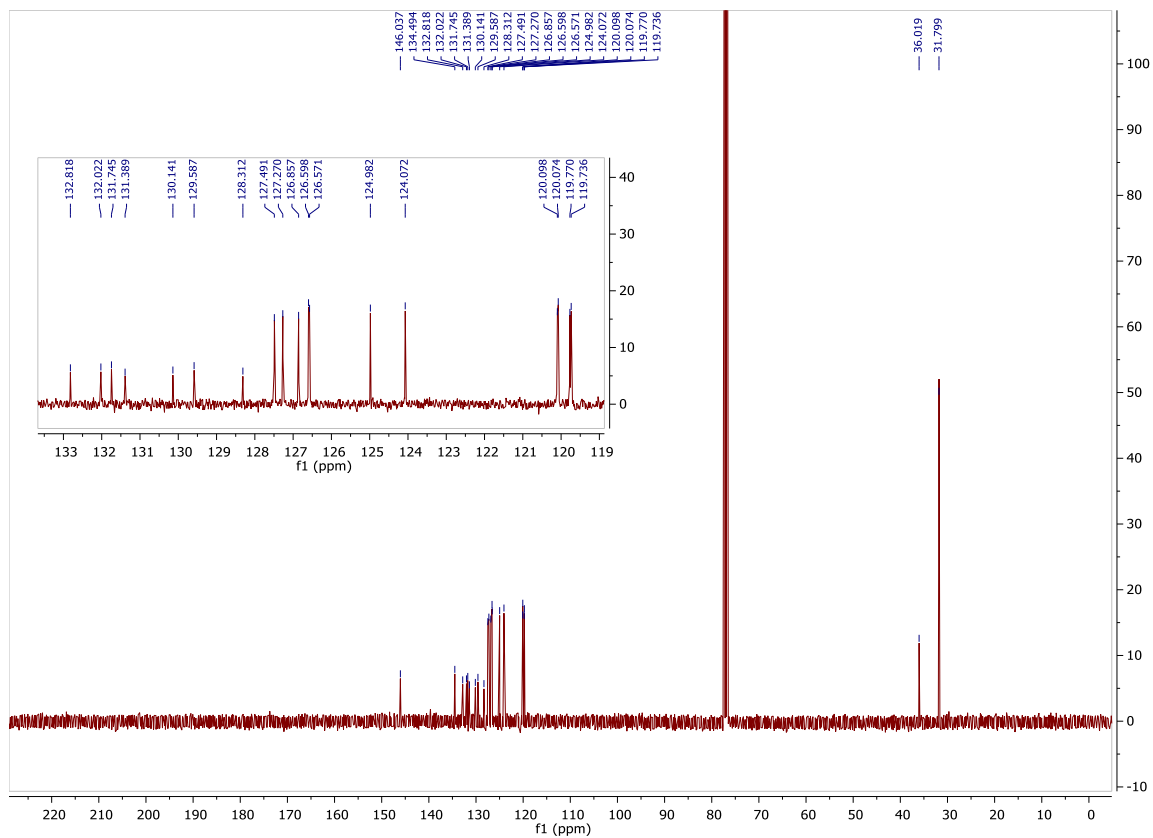

**Figure S19.**  $^1\text{H}$  (400 MHz) and  $^{13}\text{C}$  (100 MHz) NMR spectra of **2h** in  $\text{CDCl}_3$ .

#### 4. Synthesis and characterization of compounds 2i-j

Perylene (1.26 g, 5.0 mmol), AlCl<sub>3</sub> (0.200 g, 1.5 mmol) and *tert*-butylchloride (1.85 g, 20 mmol) was reacted in dry chlorobenzene (200 mL) at rt for 72 h according to a literature procedure. Following the work-up as reported and column chromatography on alumina and elutions with cyclohexane yielded 2,5,8,11-tetra-*tert*-butylperylene (**2j**) in (0.030 g) 12.6 % yield. Further, elutions with cyclohexane gave mixtures of trisubstituted perylenes as indicated by GC-MS. Further, mixtures of disubstituted *tert*-butylperylenes and 2-*tert*-butylperylene (**2j**) were obtained in cyclohexane:toluene (90:10). Only very small amounts of **2j** (0.034, 2.3%) could be isolated and pure 2,5-di-*tert*-butylperylene (traces) could be obtained.

#### 2,5,8,11-tetra-*tert*-Butylperylene (**2i**)

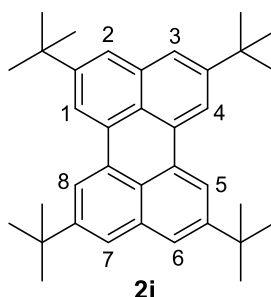

Large amounts of **2i** was synthesized using a literature procedure<sup>2</sup> according to which a 20 mL microwave vial was charged with Perylene (**1a**) (3.9 mmol, 1.0 g), ferric chloride (5.15 mmol, 835 mg) under nitrogen. Chlorobenzene (7 mL) was added to the above mixture followed by addition of *t*-BuBr (43.9 mmol, 4.93 mL) and reaction was allowed to stir at 95 °C for 5h.<sup>2</sup> Afterwards, DCM was added (50 mL) and contents were passed through a short column of basic alumina. Organic layer was extracted with H<sub>2</sub>O thrice, solvent was removed under vacuum. Column chromatography using basic alumina and cyclohexane as an eluent resulted in pure 2,5,8,11-tetra-*tert*-butylperylene (**2i**) as a yellow solid. mp (DSC): 321 °C (onset); Lit<sup>2</sup> 340 °C, Lit<sup>3</sup> 360 °C, yield (440 mg, 24.4%), R<sub>f</sub> = 0.68 in cyclohexane:toluene (9:1).

<sup>1</sup>H NMR (500 MHz, CDCl<sub>3</sub>): δ = 7.62 (d, 4H, J<sub>m</sub> = 2.0 Hz, H-3, H-4, H-9, H-10), 8.24 (d, 4H, J<sub>m</sub> = 2.0 Hz, H-1, H-6, H-7, H-12). <sup>13</sup>C NMR (126 MHz, CDCl<sub>3</sub>): δ = 31.3, 34.9, 117.7, 123.2, 125.7, 130.7, 134.9, 148.7. IR (ATR cm<sup>-1</sup>): ν = 2961, 1613, 1363, 876, 635. GC-MS (retention time = 16.899 min) m/z: 476.4 (M<sup>+</sup>). HRMS (APCI): m/z calcd for (C<sub>24</sub>H<sub>20</sub>+H)<sup>+</sup>: 476.3516; found: 477.3520.

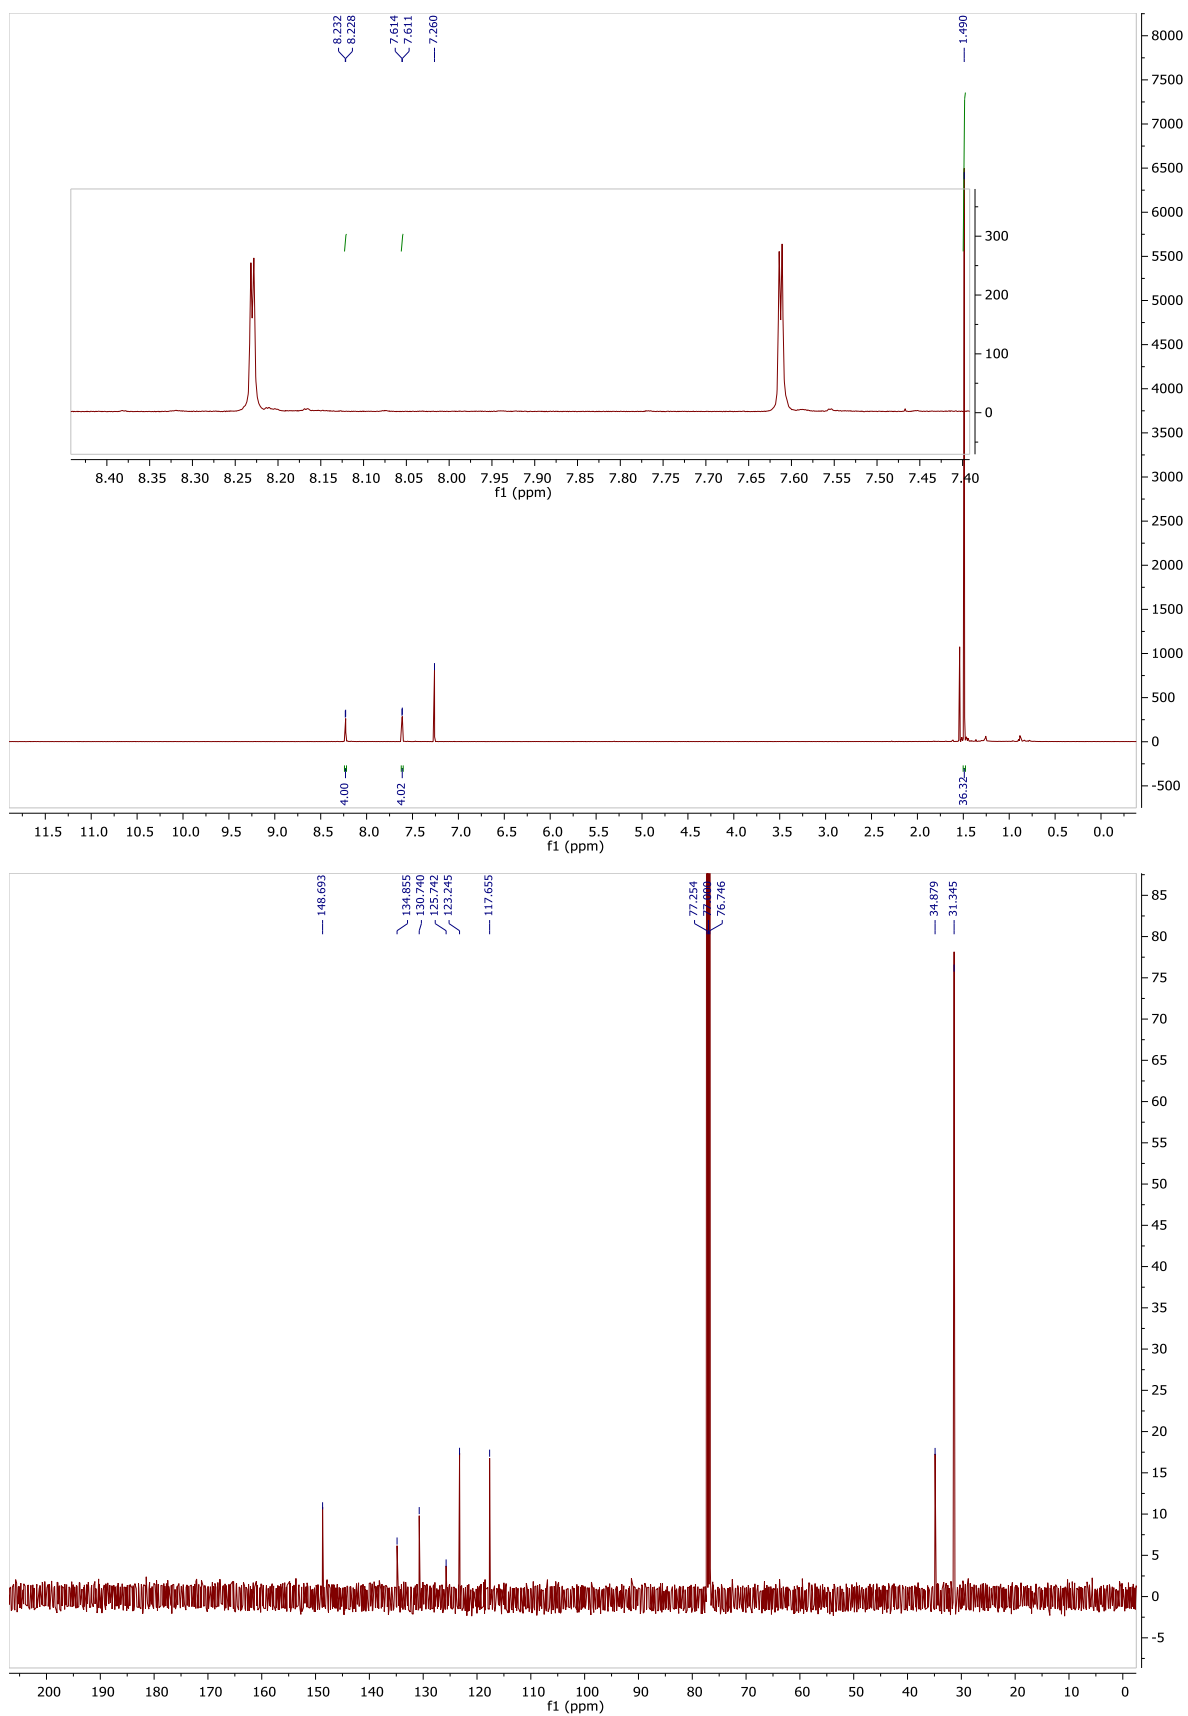

Figure S20. <sup>1</sup>H (500 MHz) and <sup>13</sup>C (126 MHz) NMR spectra of **2i** in CDCl<sub>3</sub>.

**2-tert-Butylperylene (2j)**

We tried to optimize conditions to get **2j** as the major product. In most of the cases crude  $^1\text{H}$  NMR indicated large amount of starting material perylene and minor peaks for 2-*tert*-butylperylene (**2j**) with small amounts of 2,5-di-*tert*-butylperylene (**2j'**). However reaction under dilute conditions and with excess of *tert*-butylchloride resulted in much better yields for **2j**.<sup>2,3</sup>

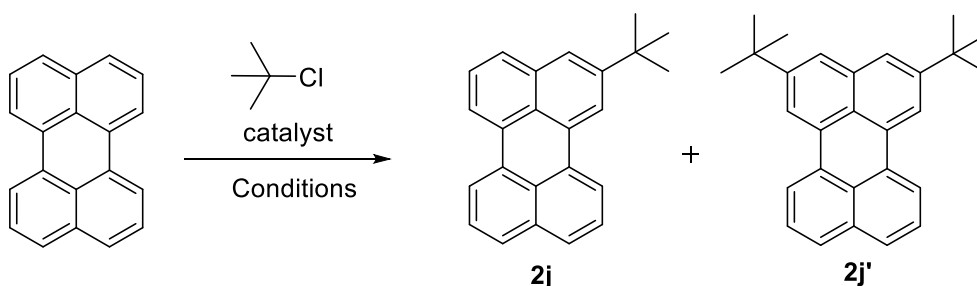

**Table S2:** Reaction of Perylene with *t*-butylchloride under different conditions.

| S. no. | Perylene (amount) | <i>t</i> -BuCl (equiv.) | Catalyst/ Equiv.    | Solvent                          | T (°C)/ Time (h)       | Crude $^1\text{H}$ NMR                                   |
|--------|-------------------|-------------------------|---------------------|----------------------------------|------------------------|----------------------------------------------------------|
| 1      | 63 mg             | 1.0                     | $\text{AlCl}_3/2.0$ | $\text{CH}_3\text{NO}_2$ (5 mL)  | rt to 40/ 16           | SM only                                                  |
| 2      | 63 mg             | 4.2                     | $\text{AlCl}_3/4.5$ | $\text{CH}_2\text{Cl}_2$ (10 mL) | 0 for 10 min to rt/ 2  | SM only                                                  |
| 3      | 63 mg             | 0.5                     | $\text{AlCl}_3/4.5$ | $\text{CH}_2\text{Cl}_2$ (10 mL) | 0 for 10 min to rt/ 16 | SM (major) + <b>2j</b> (minor) + di-product (traces)     |
| 4      | 63 mg             | 10.0                    | $\text{AlCl}_3/6.0$ | $\text{CH}_2\text{Cl}_2$ (10 mL) | rt / 16                | SM (major) + <b>2j</b> (traces)                          |
| 5      | 63 mg             | 10.0                    | $\text{AlCl}_3/6.0$ | $\text{CH}_2\text{Cl}_2$ (10 mL) | 0 for 35 min to rt/ 16 | SM (major) + <b>2j</b> & <b>2j'</b> + additional signals |
| 6      | 38 mg             | 10.0                    | $\text{AlCl}_3/5.0$ | $\text{CH}_2\text{Cl}_2$ (10 mL) | 0 for 2.5 h            | <b>2j</b> + SM (major) <b>2j'</b> (minor)                |

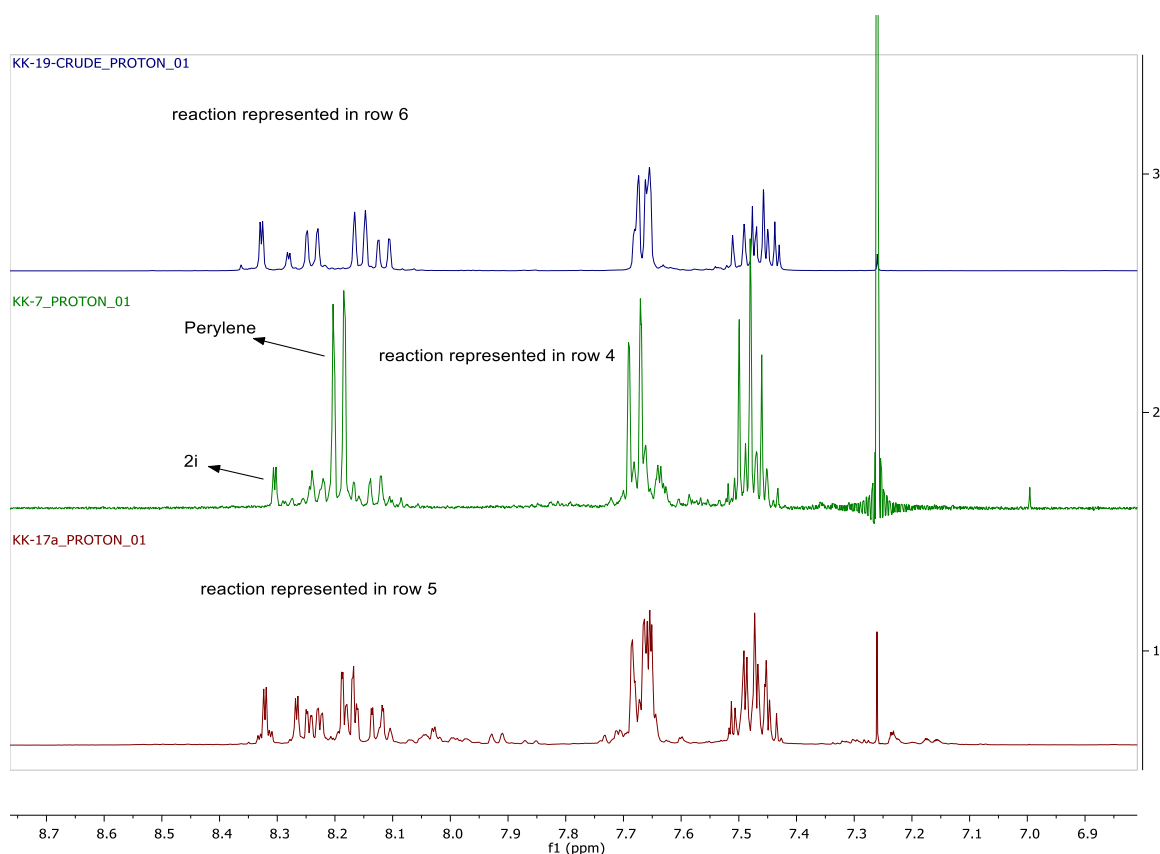

**Figure S21.** Crude  $^1\text{H}$  NMR spectrum represented by topmost (row-6, table S2), middle (row 4, table S2) and bottom (row 5, table S2).

### New procedure for synthesis of **2j**

A 10 mL microwave vial was charged with Perylene (**1a**) (0.15 mmol, 38 mg),  $\text{AlCl}_3$  (0.75, 97 mg) in glove box and dissolved in dry DCM (8 mL) under nitrogen. To the above mixture, *t*-butylchloride (1.5 mmol, 0.14 mL) in 2 mL of dry DCM was added slowly under nitrogen at 0 °C in 30 minutes. The reaction was maintained at the same temperature for additional 2 h. Afterwards, the reaction mixture was diluted with DCM (20 mL) and washed with  $\text{NaHCO}_3$  solution twice. Combined organic layers were dried using sodium sulphate, filtered and solvent was evaporated under vacuum. Purification by preparative TLC using cyclohexane:toluene (6:1) afforded 2-*t*-butylperylene (**2j**) as yellow solid. Alternatively flash column chromatography using biotage SNAP ultra 25g (flow rate 12 mL/min, solvent system cyclohexane:toluene 90:10) also resulted in pure **2j**. mp (DSC): 146 °C (onset); Lit<sup>3</sup> 145-146 °C, yield (13 mg, 28%),  $R_f = 0.48$  in cyclohexane:toluene (9:1).

$^1\text{H}$  NMR (400 MHz,  $\text{CDCl}_3$ ):  $\delta = 1.48$  (s, 9H,  $3 \times \text{CH}_3$ , *t*-Bu), 7.43-7.50 (m, 4H), 7.63-7.68 (m, 4H), 8.13 (dd, 1H,  $J_o = 7.6$  Hz,  $J_m = 1.2$  Hz), 8.17 (dd, 1H,  $J_o = 7.6$  Hz,  $J_m = 1.2$  Hz), 8.23 (dd, 1H,  $J_o = 7.6$  Hz,  $J_m = 1.2$  Hz), 8.31 (d, 1H,  $J_m = 2.0$  Hz).  $^{13}\text{C}$  NMR (100 MHz,  $\text{CDCl}_3$ ):  $\delta$

= 31.3, 34.9, 118.9, 119.6, 119.9, 120.1, 123.4, 126.4, 126.50, 126.52, 127.1, 127.68, 127.69, 127.9, 128.9, 130.80, 130.87, 131.3, 131.5, 134.76, 134.8, 148.9. **IR (ATR  $\text{cm}^{-1}$ ):**  $\nu$  = 3050, 2960, 1593, 1463, 1367, 1259, 869, 836, 812, 799, 767. **GC-MS** (retention time = 12.225 min)  $m/z$ : 308.1 ( $\text{M}^+$ ), 293.1 ( $\text{M}^+ - \text{CH}_3$ ). **HRMS (APCI):**  $m/z$  calcd for  $(\text{C}_{24}\text{H}_{20}+\text{H})^+$ : 309.1638; found: 309.1638.

2,5-di-*tert*-butylperylene (**2j'**) could not be obtained in sufficient purity and its photophysical properties were not studied.  **$^1\text{H}$  NMR (400 MHz,  $\text{CDCl}_3$ ):**  $\delta$  = 1.47 (s, 18H,  $2 \times \text{CH}_3$ , *t*-Bu), 7.46-7.49 (m, 2H, H-8 & H-11), 7.63 (d, 2H,  $J_m = 1.6$  Hz, H-3 & H-4), 7.67-7.65 (dd, 2H,  $J_o = 8.4$  Hz,  $J_m = 1.2$  Hz, H-9 & H-10), 8.23-8.21 (dd, 2H,  $J_o = 7.6$  Hz,  $J_m = 1.2$  Hz, H-7 & H-12), 8.24 (d, 2H,  $J_m = 2.0$  Hz, H-1 & H-6). **GC-MS** (retention time = 13.29 min)  $m/z$ : 364.2 ( $\text{M}^+$ ).

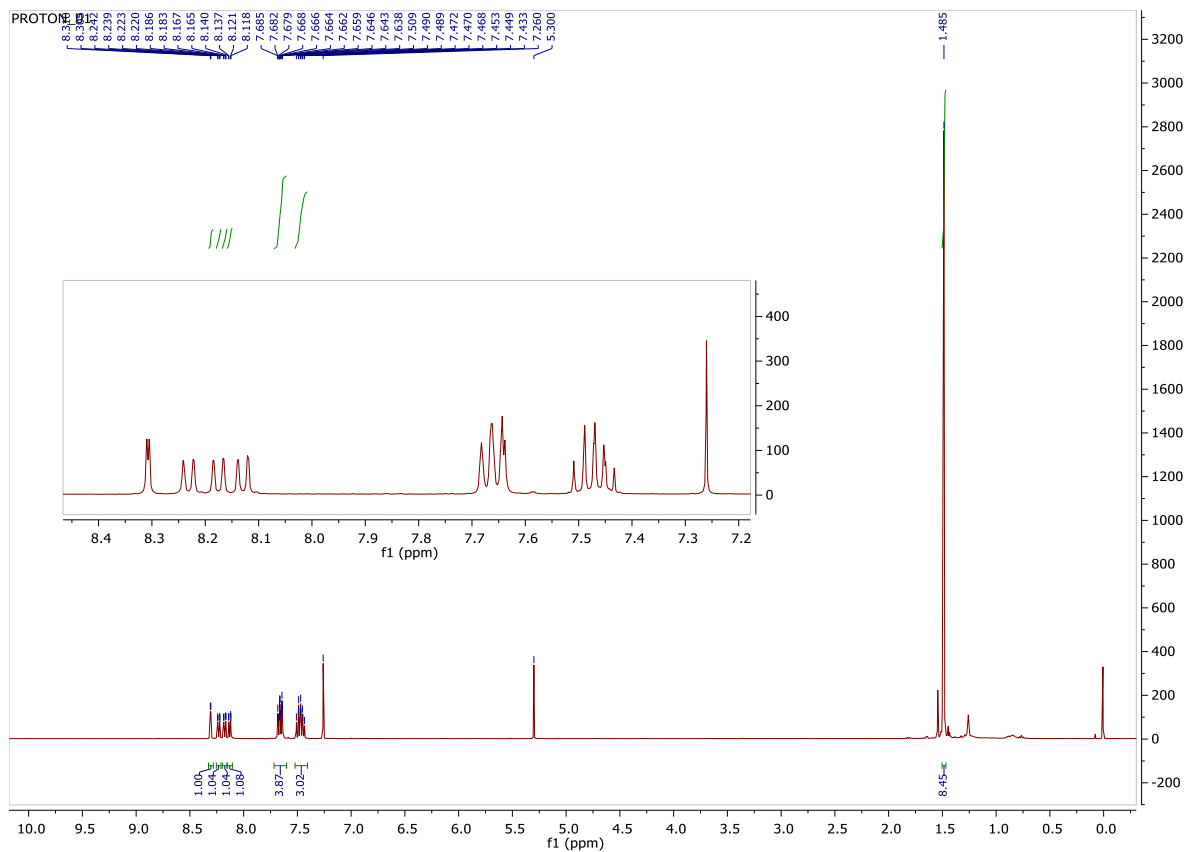

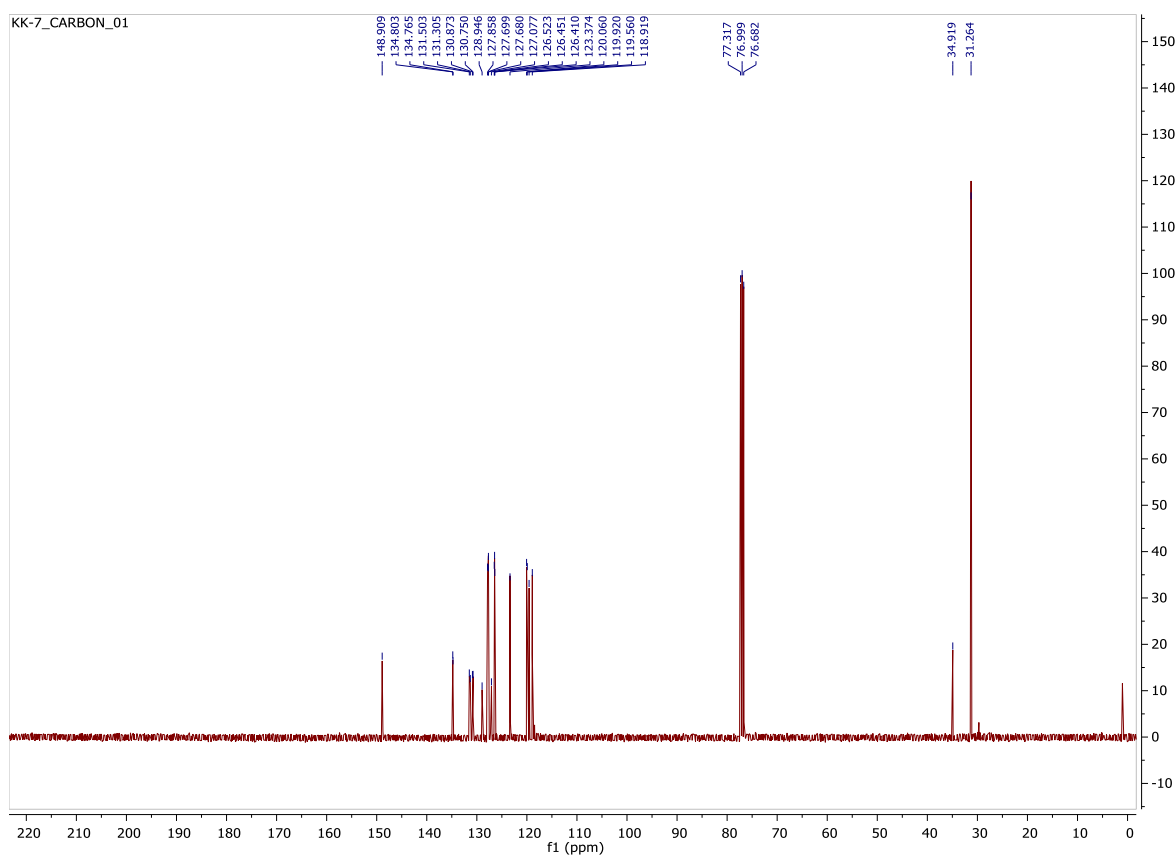

**Figure S22.**  $^1\text{H}$  (400 MHz) and  $^{13}\text{C}$  (100 MHz) NMR spectra of **2j** in  $\text{CDCl}_3$ .



## 5. Experiments related to mechanistic pathway

Perylene (**1a**) (500 mg, 2.0 mmol), *n*-BuLi (2.2 M in hexane, 8.0 mmol, 3.6 mL) were reacted in THF (80 mL) under nitrogen at -30 °C for 2.5 h. Aqueous work up followed by flash column chromatography on silica gel (80 g column, flow rate 35 mL/min) using Hexane:DCM (90:10) afforded 60 mg of 1-butyl-1,12b-dihydroperylene (**2a'**) in sufficient purity for characterization. Later fractions gave mixture of **2a** and **2a'**. The structure was confirmed by detailed 1D and 2D NMR and GC-MS experiments.

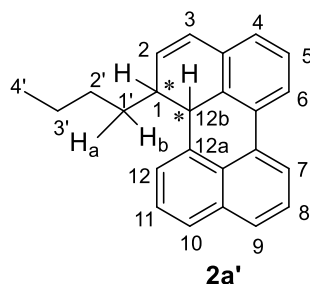

**<sup>1</sup>H NMR (400 MHz, CDCl<sub>3</sub>):**  $\delta$  = 0.78 (t, 3H,  $J$  = 7.2 Hz, H-4'), 1.06-1.34 (m, 6H, H-1', H-2' & H-3'), 3.00-3.06 (m, 1H), 4.83 (d, 1H,  $J$  = 6.0 Hz, H-12b), 6.51 (dd, 1H,  $J_1$  = 9.6 Hz,  $J_2$  = 6.4 Hz, H-2), 6.64 (d, 1H,  $J_1$  = 9.6 Hz, H-3), 7.10 (dd, 1H,  $J_1$  = 7.2 Hz,  $J_2$  = 1.2 Hz), 7.33 (ddd, 1H,  $J_1$  = 8.0 Hz,  $J_2$  = 7.2 Hz,  $J_3$  = 0.8 Hz), 7.50-7.57 (m, 3H), 7.74-7.76 (m, 1H), 7.79-7.77 (m, 1H), 8.01 (m, 1H,  $J_1$  = 8.0 Hz,  $J_2$  = 0.8 Hz), 8.06 (m, 1H). **<sup>13</sup>C NMR (100 MHz, CDCl<sub>3</sub>):**  $\delta$  = 14.0 (C-4'), 22.8, 27.9, 29.8, 38.5 (C-1), 41.0 (C-12b), 118.6, 121.7, 123.6, 125.4, 125.8, 126.0, 126.1, 126.8, 127.0, 127.8, 128.8, 130.2, 131.0, 131.49, 131.5, 134.1, 134.3, 134.7, 134.9. **GC-MS** (retention time = 11.030 min)  $m/z$ : 310 ( $M^+$ ).

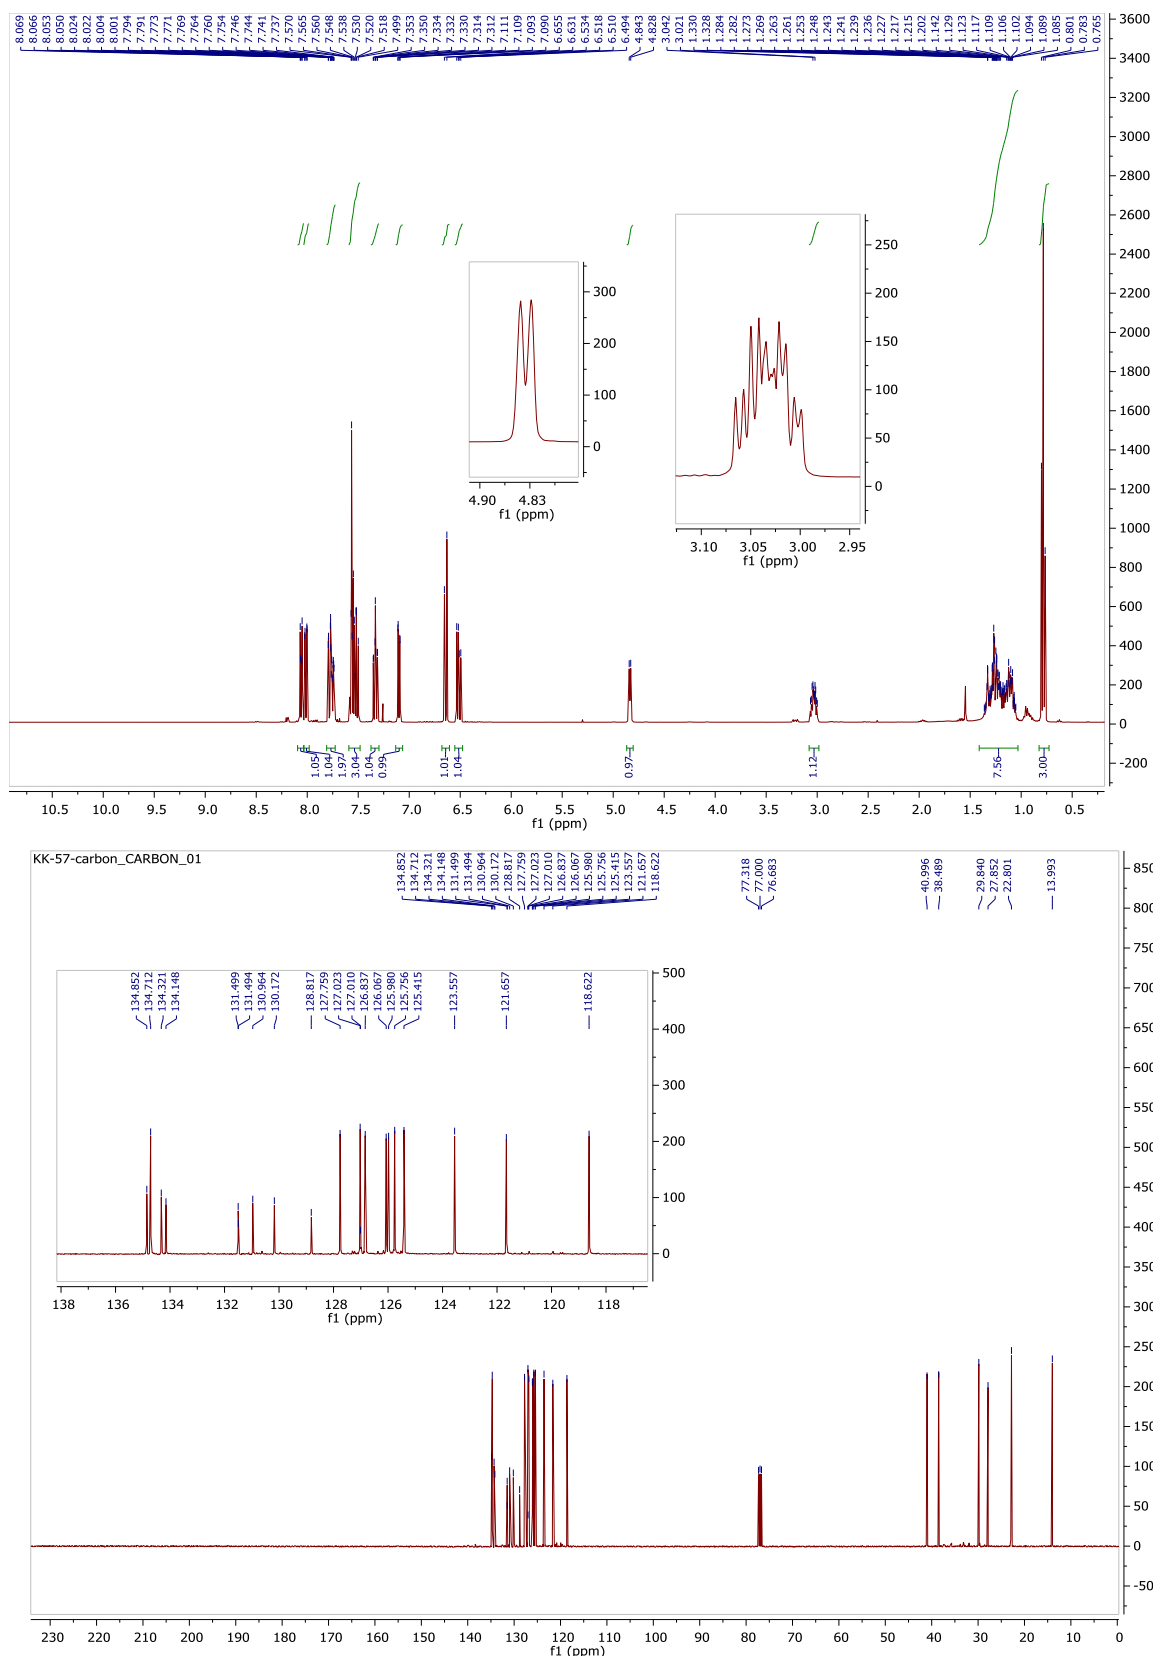

Figure S23. <sup>1</sup>H (400 MHz) and <sup>13</sup>C (100 MHz) NMR spectra of **2a'** in CDCl<sub>3</sub>.

File :D:\MassHunter\GCMS\All users\Data\Karl Borjesson\khushbu kus  
... hwaha\KK-57-Carbon.D  
Operator : alex  
Instrument : 5977  
Acquired : 18 Oct 2017 10:45 using AcqMethod Khushbu\_method.M  
Sample Name: Khushbu  
Misc Info :

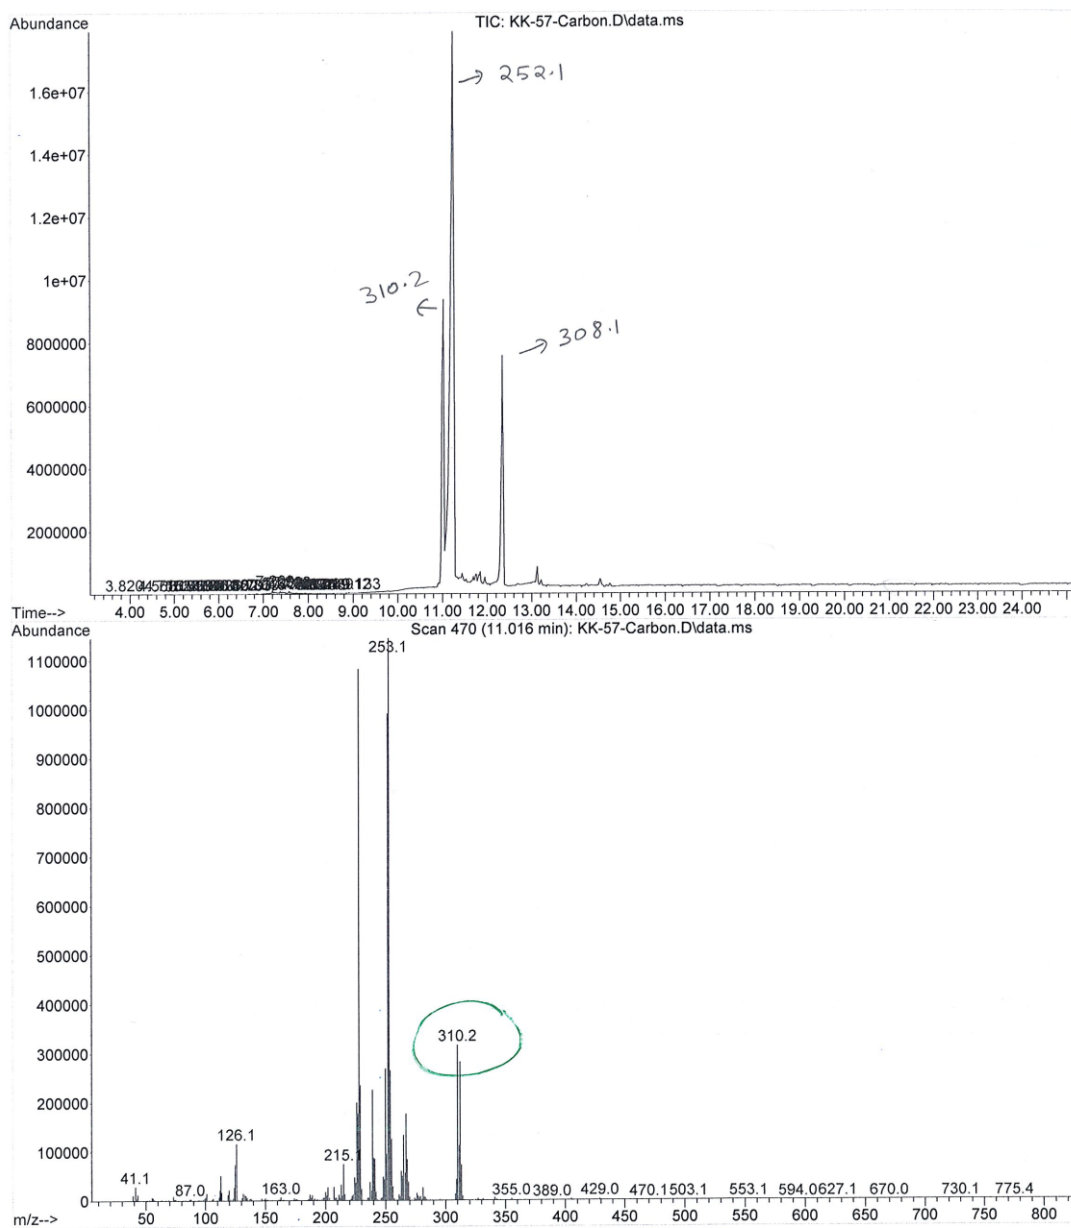

Figure S24. GC-MS spectrum of 2a' in CDCl<sub>3</sub>.

## Reaction of 2a' with Oxygen

1-Butyl-1,12b-dihydroperylene (**2a'**) (25 mg) was dissolved in hexane (5 mL) and connected to O<sub>2</sub> balloon. After 12 h, <sup>1</sup>H NMR was checked which showed signals corresponding to **2a'** decreased and an increase in signals for **2a** is observed.

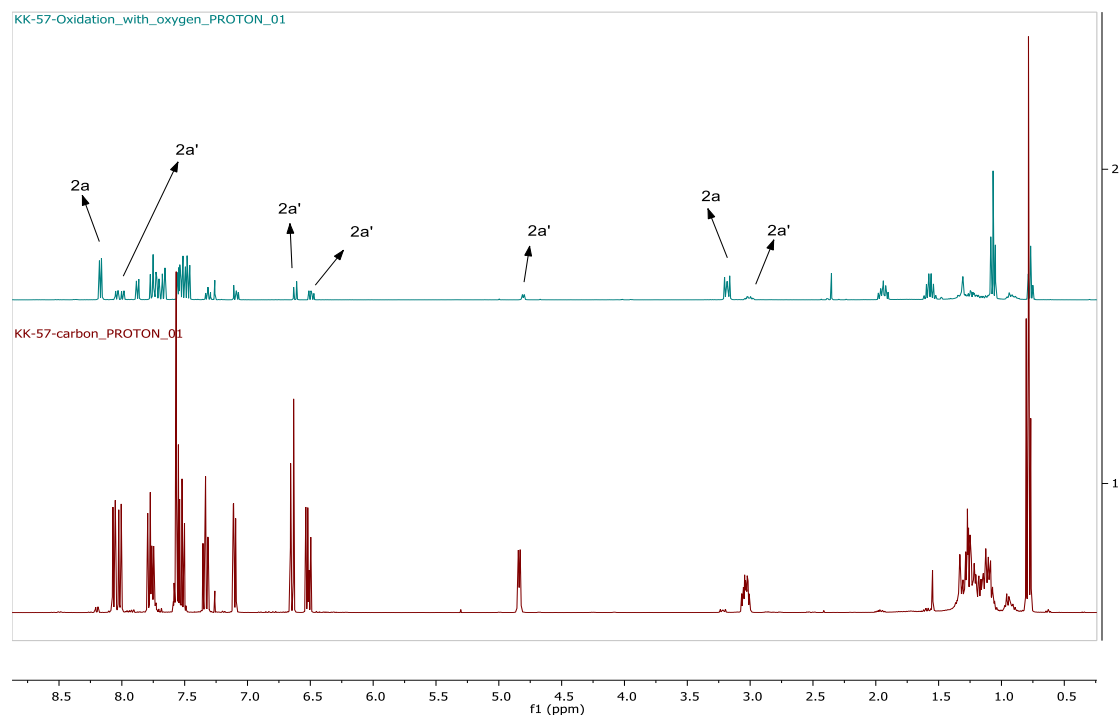

**Figure S25.** Overlay of spectrum before and after reaction with oxygen in CDCl<sub>3</sub>.

## Reaction with DDQ

1-Butyl-1,12b-dihydroperylene (**2a'**) (25 mg, 1.0 equiv.) was dissolved in Benzene (5 mL) and DDQ (22 mg, 1.2 equiv.) was added. After 5 h, crude <sup>1</sup>H NMR showed signals for **2a**.

## Experiment for trapping Lithiated monoanion (**1a'**) with MeI

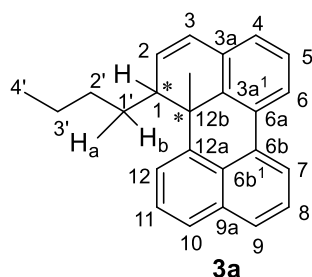

Perylene (**1a**) (126 mg, 0.5 mmol), *n*-BuLi (2.2 M in hexane, 0.5 mmol, 0.19 mL) were reacted in dry THF (80 mL) under nitrogen at -30 °C for 2.5 h following the general procedure. Afterwards, excess of MeI (212 mg, 3.0 equiv.) was added dropwise. Color of the reaction

changed from greenish to red-orange after 10 minutes. Reaction was allowed to come at 0 °C in approximately 1 h. Flash column chromatography on silica gel (80 g column, 50 mL/min) cyclohexane:toluene (90:10) resulted in pure cream solid **3a**. mp (DSC): 126 °C ( ), yield (80 mg, 50%).

**<sup>1</sup>H NMR (400 MHz, CDCl<sub>3</sub>):**  $\delta$  = 0.75 (t, 3H,  $J$  = 7.2 Hz, H-4'), 0.95-1.42 (m, 6H), 1.44 (s, 3H, CH<sub>3</sub>-C-12b), 2.93 (ddd, 1H,  $J_1$  = 11.5 Hz,  $J_2$  = 6.4 Hz,  $J_3$  = 3.2 Hz, H-1), 6.38 (dd, 1H,  $J_1$  = 9.5 Hz,  $J_2$  = 6.4 Hz, H-2), 6.59 (d, 1H,  $J_1$  = 9.5 Hz, H-3), 7.09 (dd, 1H,  $J_1$  = 7.3 Hz,  $J_2$  = 1.2 Hz, H-4), 7.32 (dd, 1H,  $J_1$  = 8.0 Hz,  $J_2$  = 7.3 Hz, H-5), 7.58-7.51 (m, 3H, H-8, H-11, H-10), 7.75 (dd, 1H,  $J_1$  = 7.6 Hz,  $J_2$  = 1.6 Hz, H-12), 7.83-7.80 (m, 1H, H-9), 8.05 (dd, 1H,  $J_1$  = 8.2 Hz,  $J_2$  = 1.2 Hz, H-6), 8.13-8.11 (m, 1H, H-7). **<sup>13</sup>C NMR (100 MHz, CDCl<sub>3</sub>):**  $\delta$  = 14.0 (C-4'), 22.8, 30.0, 31.3, 34.1(CH<sub>3</sub>-C-12b), 42.2 (q, C-12b), 43.9 (C-1), 118.9 (C-7), 122.2 (C-6), 122.7 (C-11), 125.6 (C-12), 125.9, 126.3, 126.36, 126.39, 126.7 (C-5), 127.1 (q), 128.0 (C-9), 129.5 (q, C-6b), 131.0 (q, C-6a), 132.8 (C-2), 133.0 (q, C-3a), 134.0 (q), 136.3 (q, C-3b), 141.0 (q, C-12a). **IR (ATR cm<sup>-1</sup>):**  $\nu$  = 2924, 1580, 1454, 1375, 1263, 812, 774, 734, 558. **GC-MS** (retention time = 10.684 min)  $m/z$ : 324.2 (M<sup>+</sup>), 309.2 (M<sup>+</sup> -CH<sub>3</sub>). **HRMS (APCI):**  $m/z$  calcd for (C<sub>25</sub>H<sub>22</sub>+H)<sup>+</sup>: 325.1951; found: 325.1964.

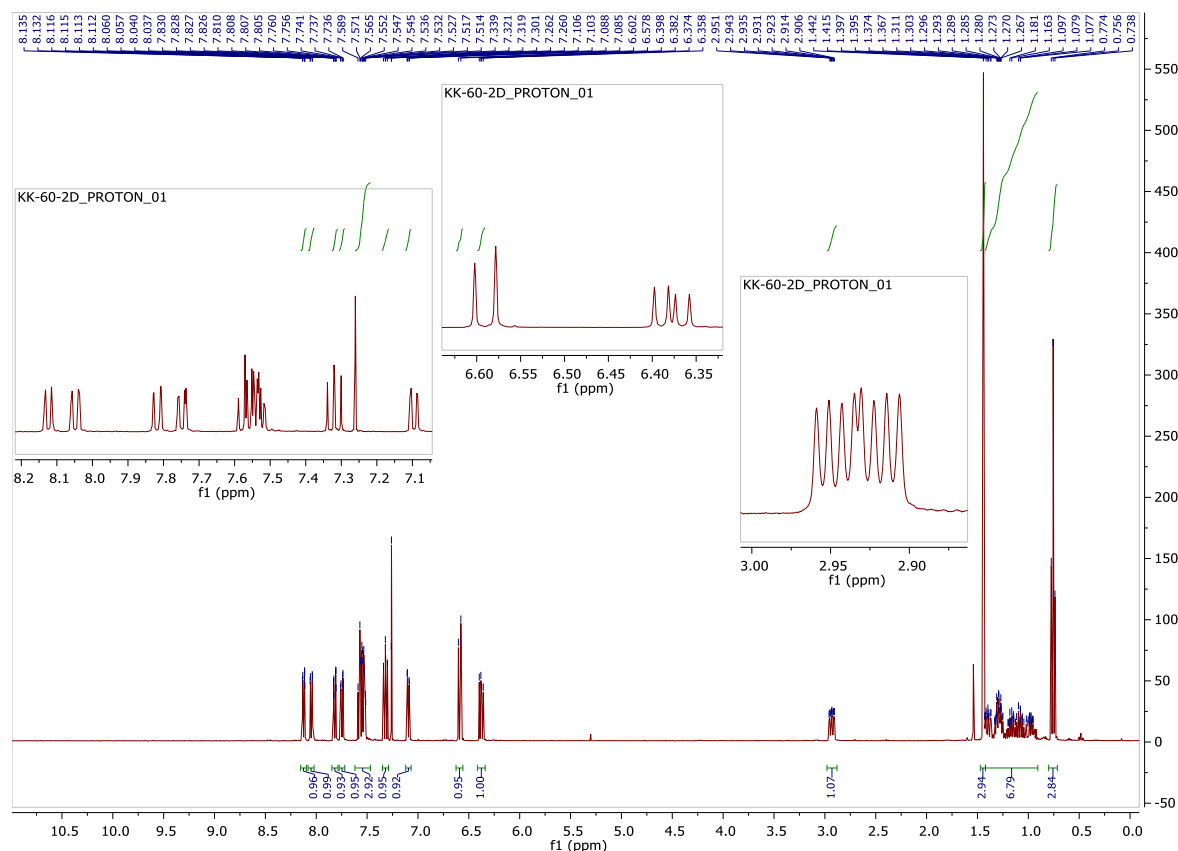

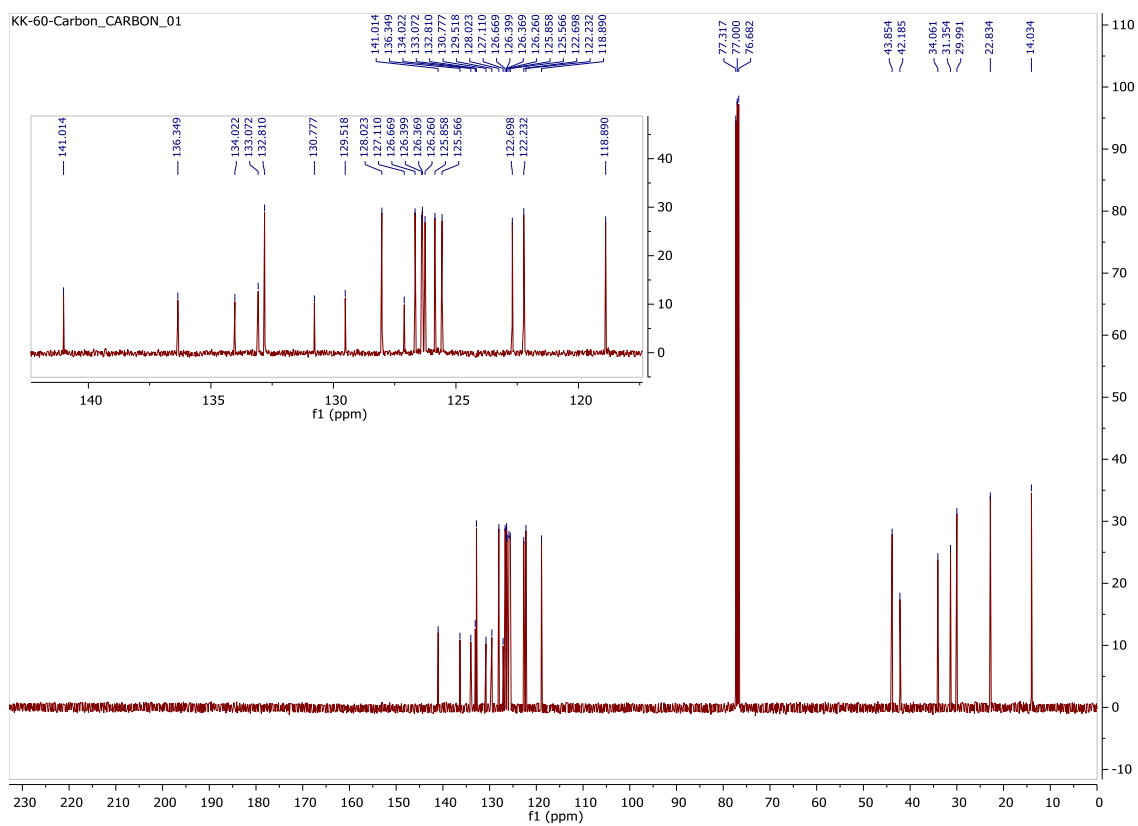

**Figure S26.**  $^1\text{H}$  (400 MHz) and  $^{13}\text{C}$  (100 MHz) NMR spectra of **3a** in  $\text{CDCl}_3$ .

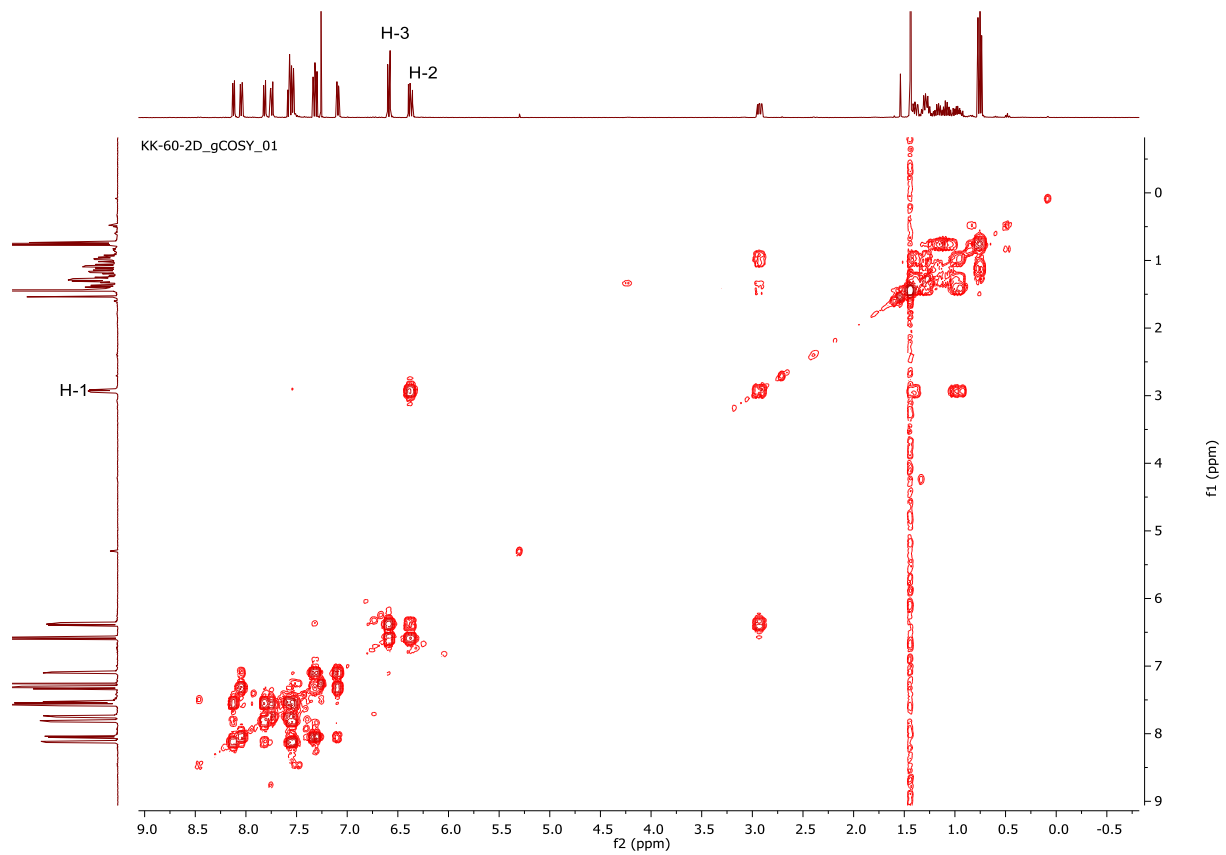

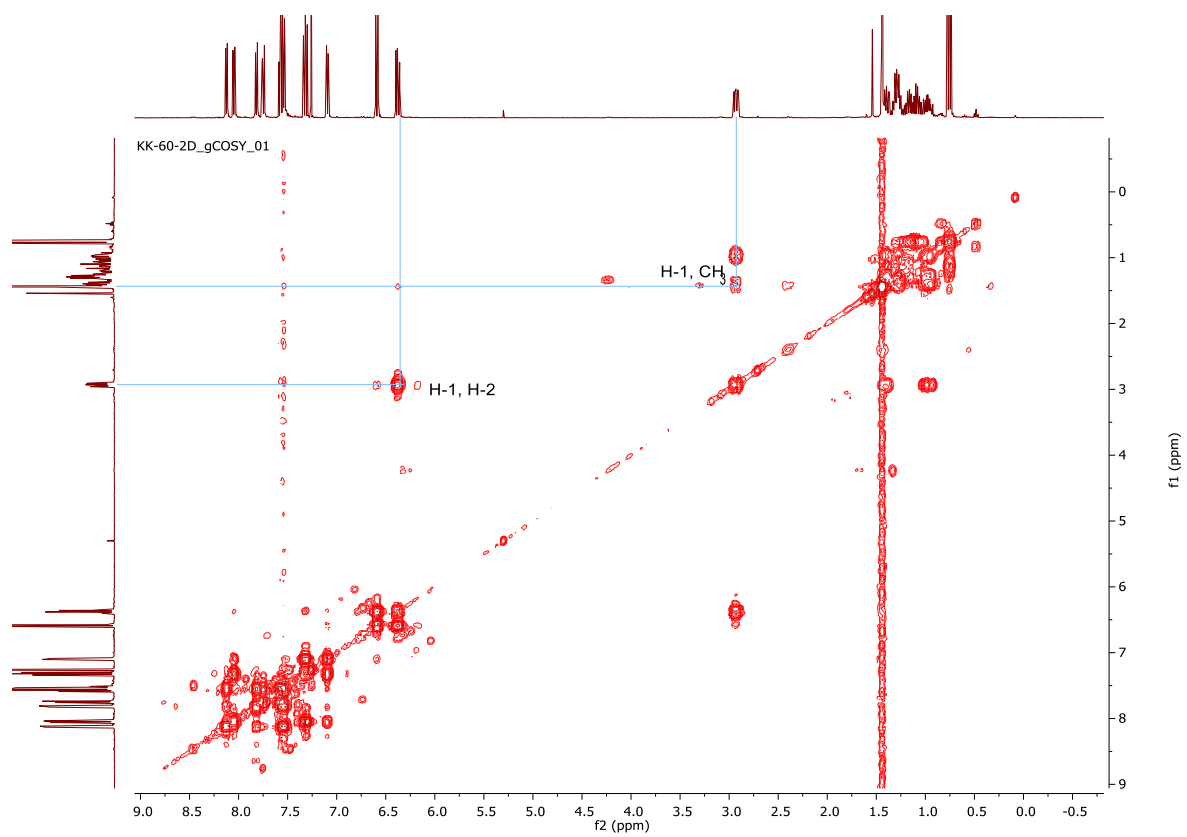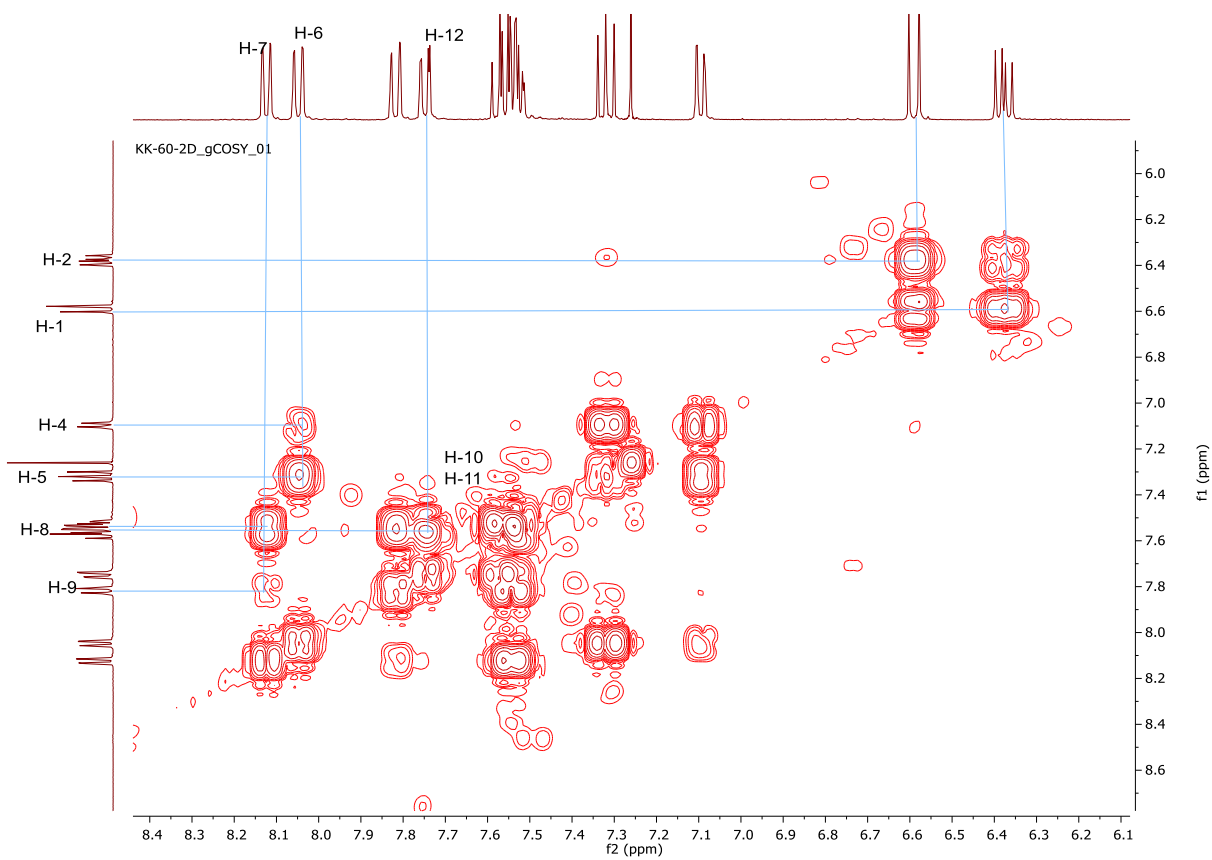

Figure S27. COSY NMR spectra of **3a** in CDCl<sub>3</sub>.

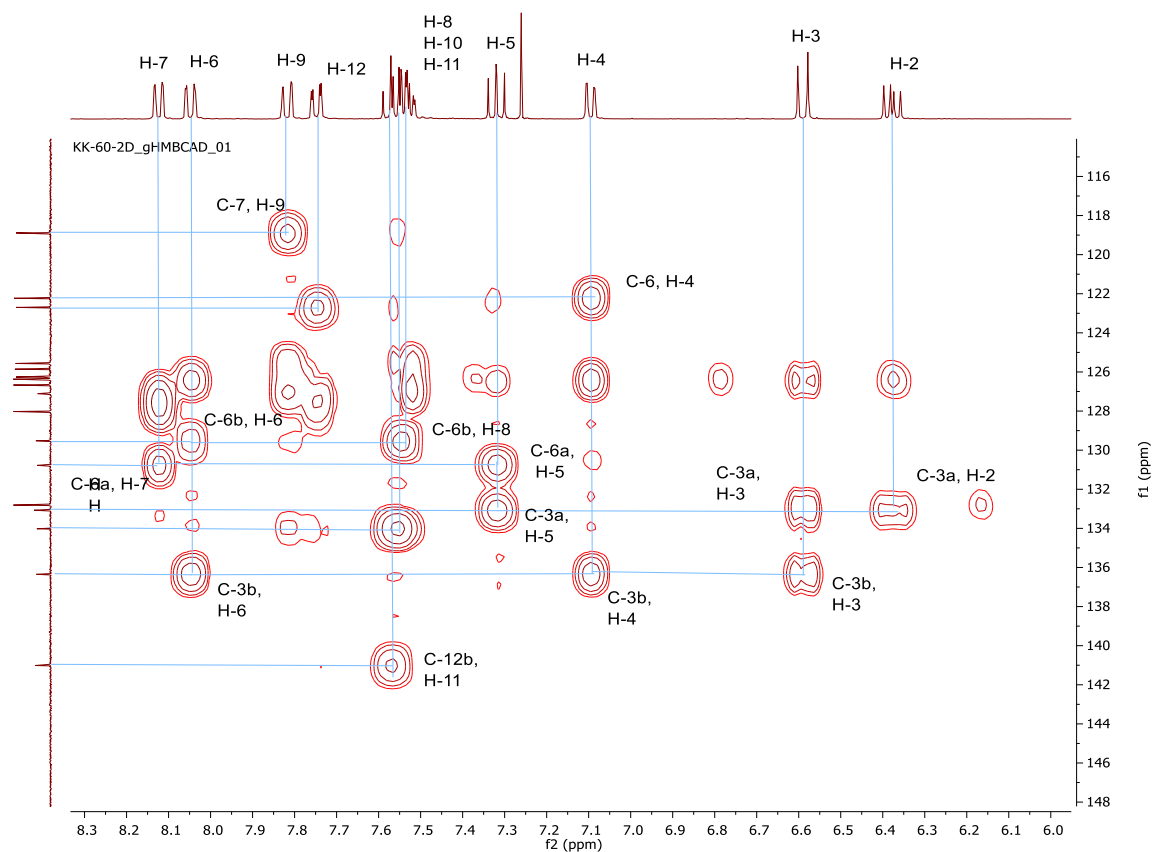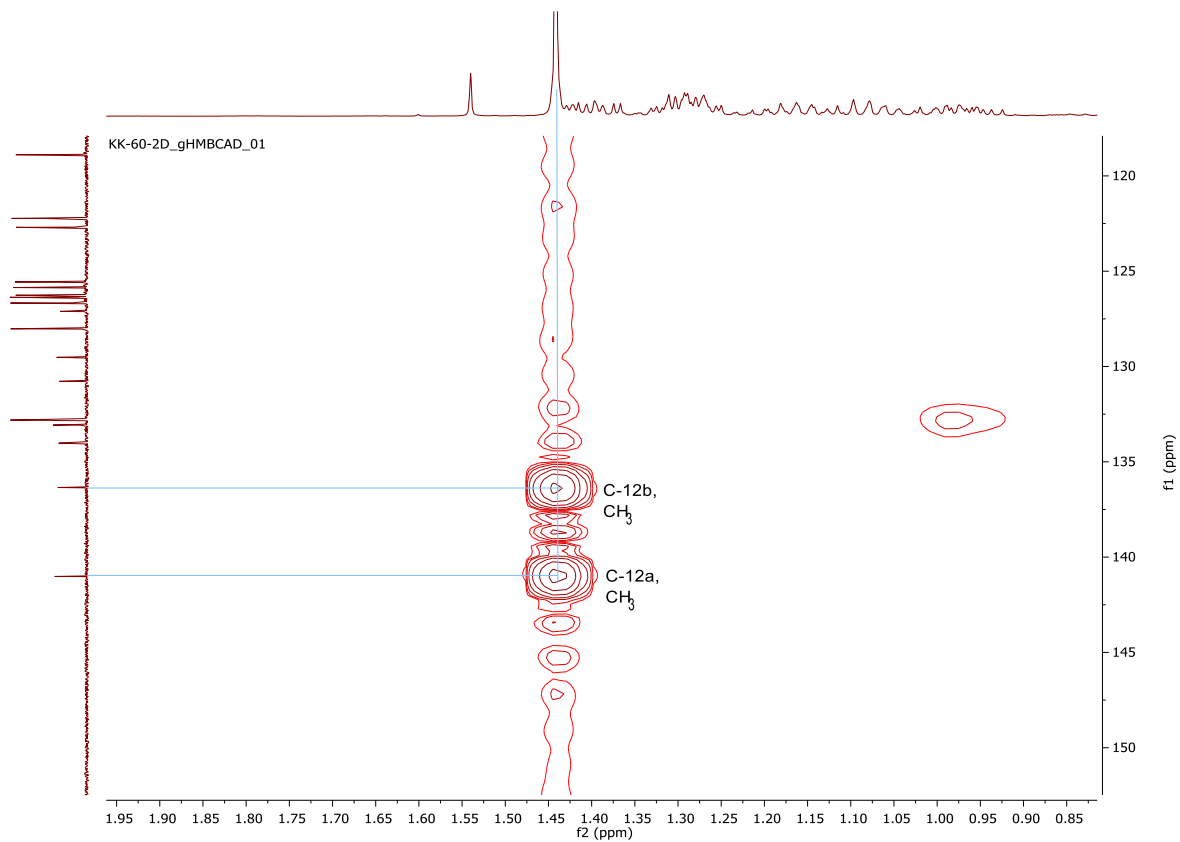



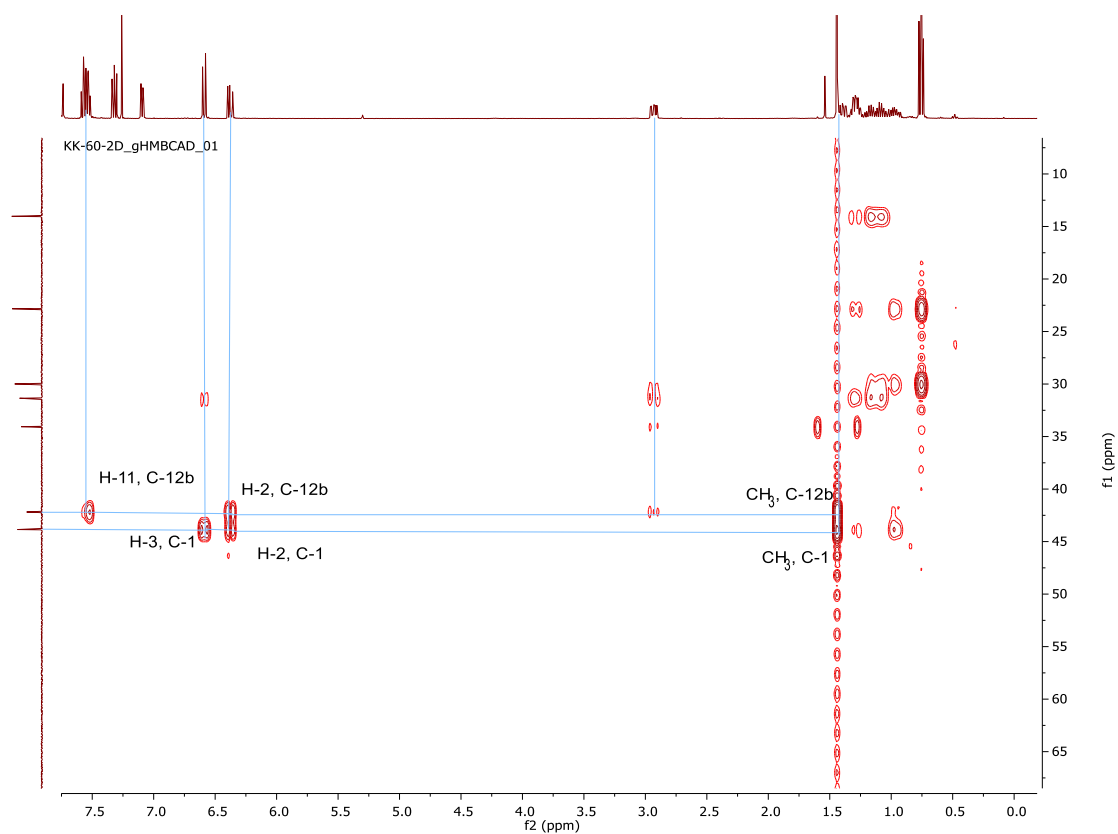

**Figure S28.** HMBC NMR spectra of **3a** in CDCl<sub>3</sub>.

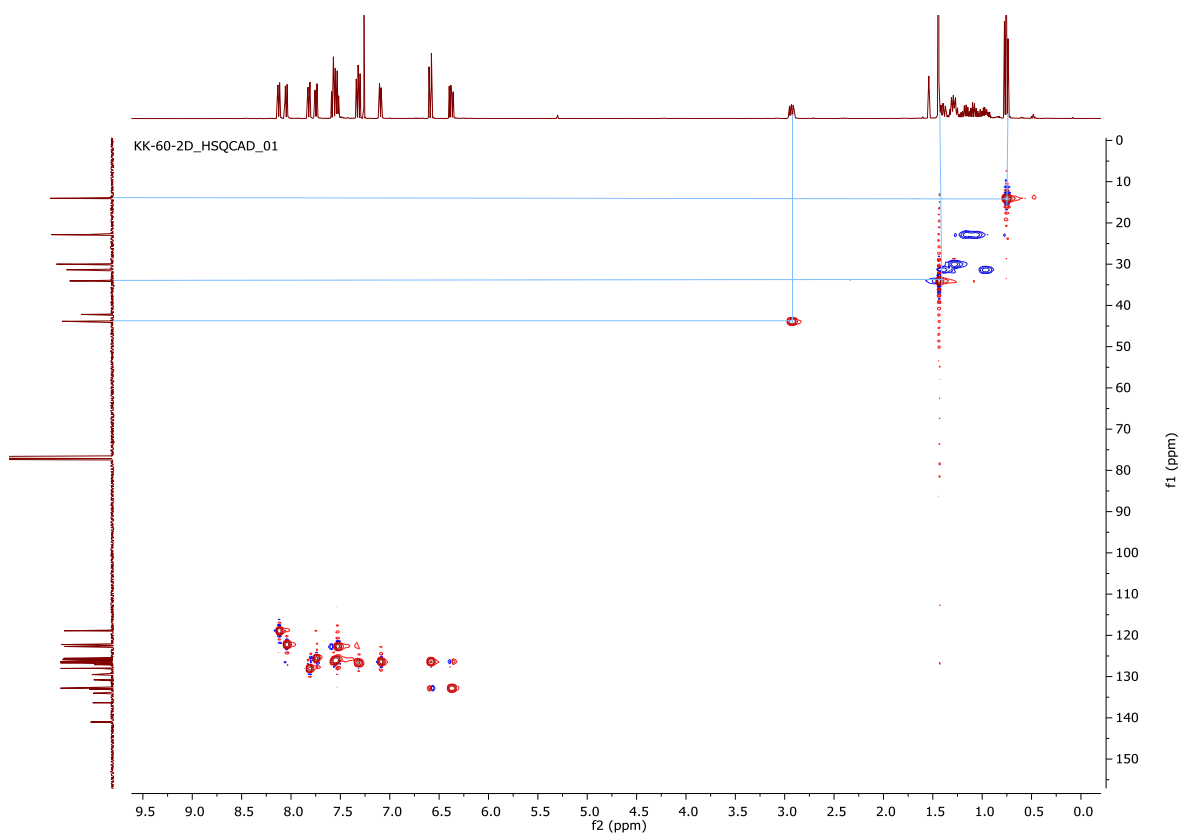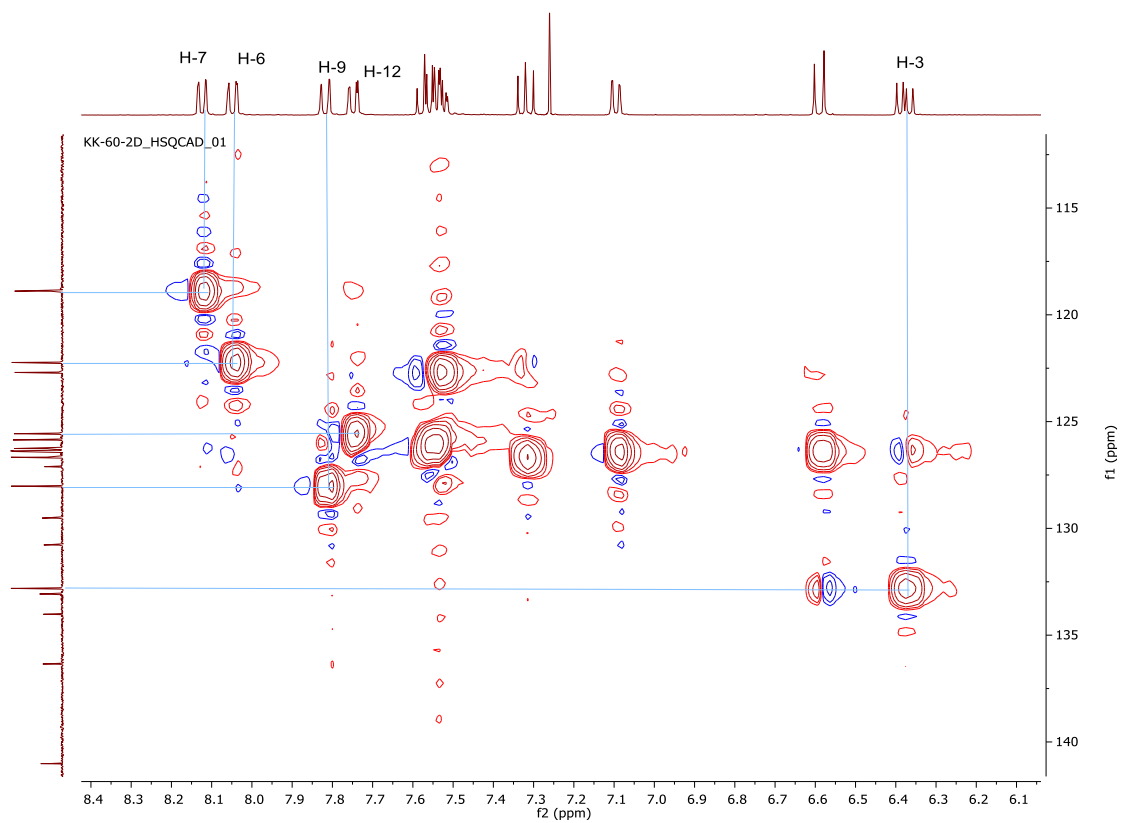

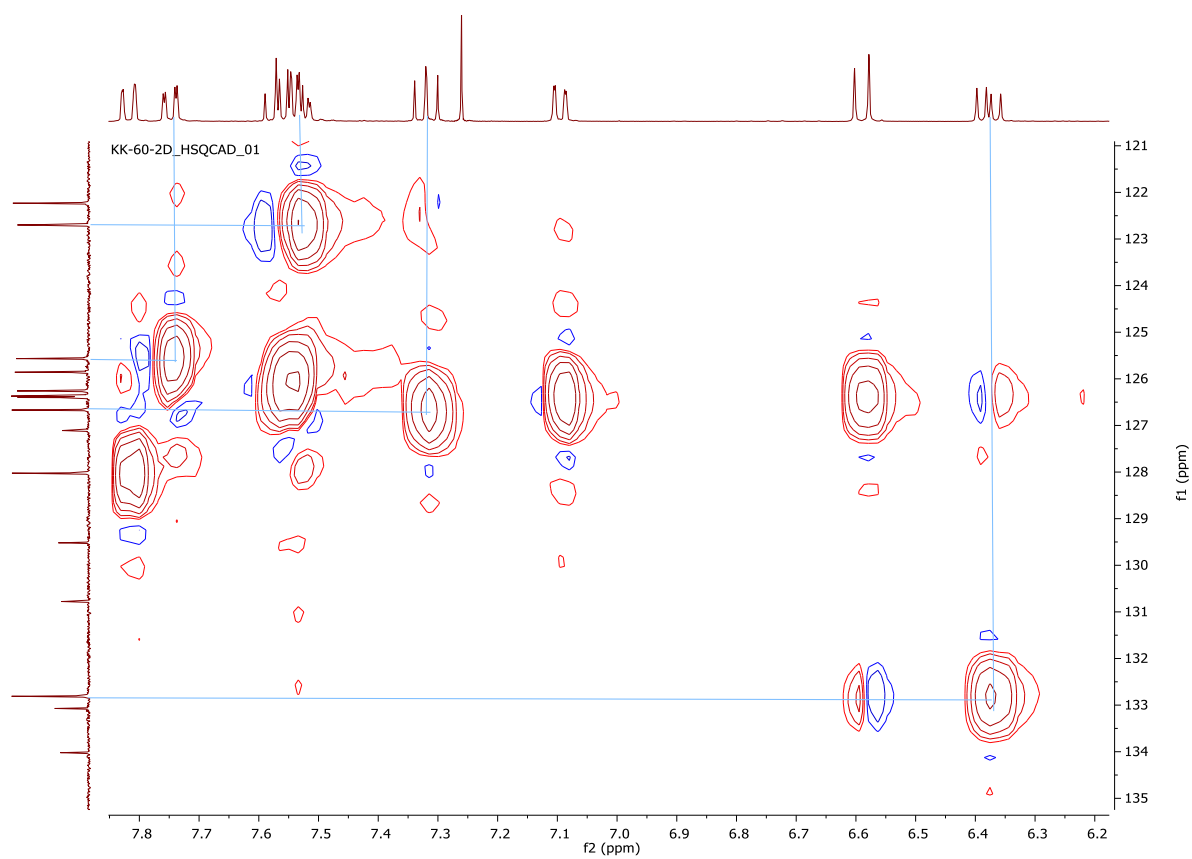

**Figure S29.** HMBC NMR spectra of **3a** in  $\text{CDCl}_3$ .

File :D:\MassHunter\GCMS\All users\Data\Karl Borjesson\khushbu kus  
hwaha\KK-60.D  
Operator : Severin  
Instrument : 5977  
Acquired : 10 Nov 2017 21:27 using AcqMethod Khushbu\_method.M  
Sample Name: Khushbu  
Misc Info :

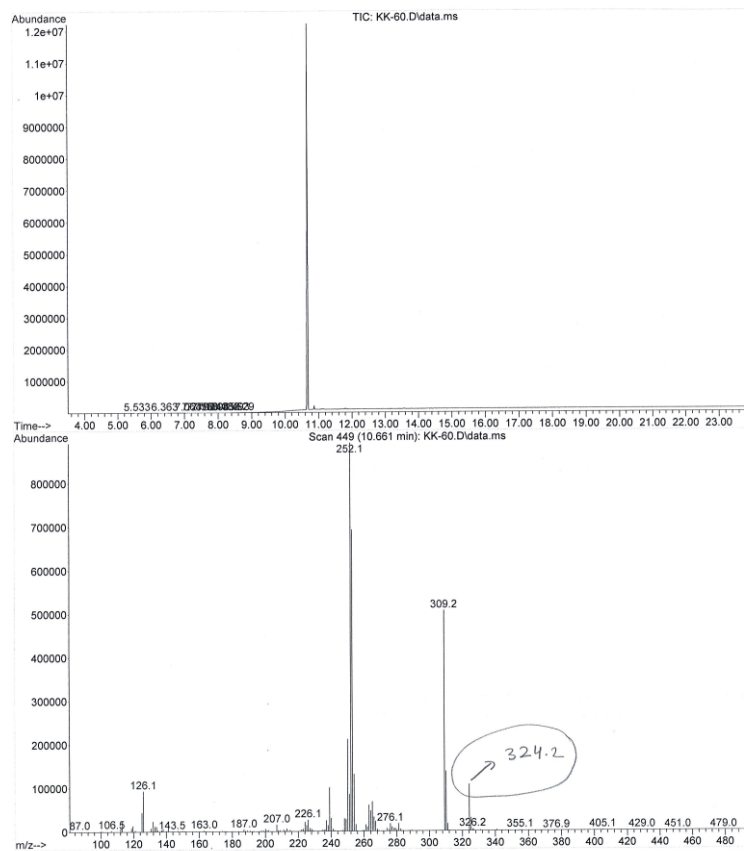

Figure S30. GC-MS spectra of 3a.

## 6. Low temperature NMR for 2a

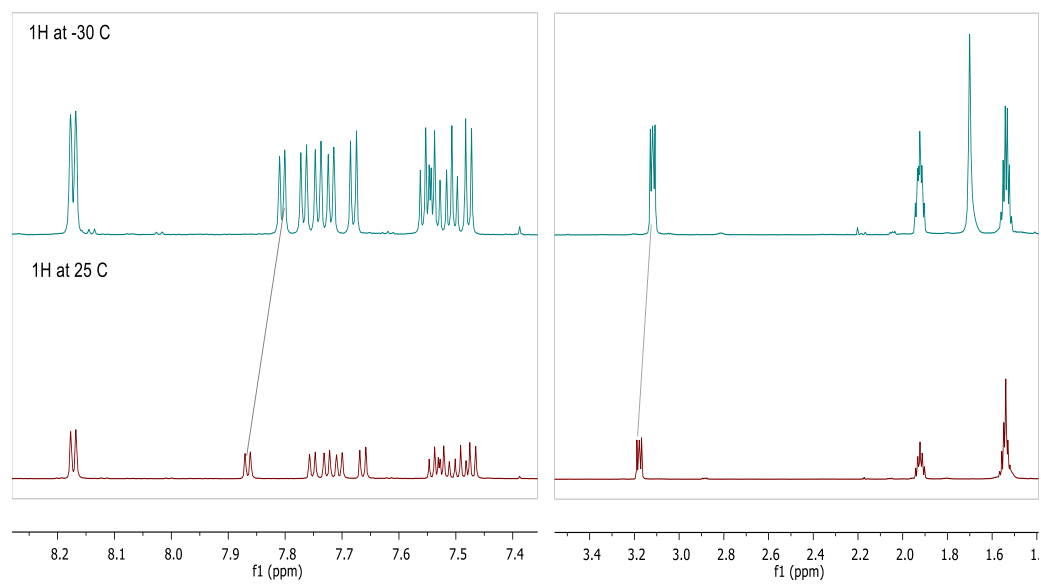

**Figure S31.** <sup>1</sup>H NMR of *n*-butylperylene at -30 °C (up) and 25 °C (down).

## 7. Single crystal X-ray of 2c

**Method and data:** X-Ray crystallographic data was obtained on Single Crystal X-ray diffractometer Bruker D8 VENTURE which is equipped with the PHOTON 100CMOS detector. The diffractometer is equipped with Incotec Cu K $\alpha$  ( $\lambda = 1.54184 \text{ \AA}$ ) or Mo K $\alpha$  ( $\lambda = 0.71073 \text{ \AA}$ ) microfocus X-ray sources, and a Cryojet low-temperature device. The cryojet was used to lower the temperature to 100K for data collection. A small crystal of about 0,1 \* 0.05 \* 0.03 mm in size was used for collecting the single crystal data. The crystal was gently mounted on a string loop and studied at cryo conditions. A full sphere of data to 0.65  $\text{\AA}$  resolution was collected with the Mo radiation source. In total about 20h of data collection, no change or physical deformation was observed in the mounted crystal.

The data were processed using APEX3 software. Unit cell dimensions were refined using the entire data sets. The structure was solved (direct methods) and refined (full-matrix least-squares on  $F^2$ ) using SHELXL. Non-hydrogen atoms were refined anisotropically, while hydrogen atoms were introduced at calculated positions as riding on their corresponding carbon atoms and refined isotropically. Geometric calculations were carried out using the Shelx, PLATON and Olex 2<sup>4</sup> software packages.

### Phase data

|                         |                                                                                                            |
|-------------------------|------------------------------------------------------------------------------------------------------------|
| <b>Formula sum</b>      | C <sub>96</sub> H <sub>80</sub>                                                                            |
| <b>Formula weight</b>   | 1233.69.g/mol                                                                                              |
| <b>Crystal system</b>   | monoclinic                                                                                                 |
| <b>Space-group</b>      | P 1 21/n 1 (14)                                                                                            |
| <b>Cell parameters</b>  | a=9.1323(5). $\text{\AA}$ b=11.9121(7) $\text{\AA}$ c=15.1512(9) $\text{\AA}$ $\beta$ =105.422(1) $^\circ$ |
| <b>Cell ratio</b>       | a/b=0.7666 b/c=0.7862 c/a=1.6591                                                                           |
| <b>Cell volume</b>      | 1588.87(16) $\text{\AA}^3$                                                                                 |
| <b>Calc. density</b>    | 1.28926.g/cm <sup>3</sup>                                                                                  |
| <b>Wyckoff sequence</b> | e44                                                                                                        |

| Atom | Wyck. | Site | x/a     | y/b     | z/c     | U [ $\text{\AA}^2$ ] |
|------|-------|------|---------|---------|---------|----------------------|
| C1   | 4e    | 1    | 0.61865 | 0.60368 | 0.27461 |                      |
| C2   | 4e    | 1    | 0.49360 | 0.53290 | 0.23089 |                      |
| C3   | 4e    | 1    | 0.44258 | 0.53780 | 0.13626 |                      |

|      |    |   |          |         |         |       |
|------|----|---|----------|---------|---------|-------|
| H3   | 4e | 1 | 0.36810  | 0.48544 | 0.10524 | 0.020 |
| C4   | 4e | 1 | 0.49744  | 0.61769 | 0.08472 |       |
| H4   | 4e | 1 | 0.45876  | 0.61898 | 0.02000 | 0.024 |
| C5   | 4e | 1 | 0.60569  | 0.69342 | 0.12668 |       |
| H5   | 4e | 1 | 0.63689  | 0.75054 | 0.09185 | 0.024 |
| C6   | 4e | 1 | 0.67128  | 0.68659 | 0.22222 |       |
| C7   | 4e | 1 | 0.79337  | 0.75716 | 0.26593 |       |
| H7   | 4e | 1 | 0.82769  | 0.81326 | 0.23157 | 0.025 |
| C8   | 4e | 1 | 0.86238  | 0.74539 | 0.35706 |       |
| H8   | 4e | 1 | 0.94276  | 0.79452 | 0.38603 | 0.028 |
| C9   | 4e | 1 | 0.81547  | 0.66124 | 0.40833 |       |
| H9   | 4e | 1 | 0.86514  | 0.65413 | 0.47167 | 0.024 |
| C10  | 4e | 1 | 0.69802  | 0.58811 | 0.36853 |       |
| C11  | 4e | 1 | 0.52532  | 0.42762 | 0.37646 |       |
| C12  | 4e | 1 | 0.65955  | 0.49046 | 0.41717 |       |
| C13  | 4e | 1 | 0.75024  | 0.45786 | 0.50211 |       |
| H13  | 4e | 1 | 0.84228  | 0.49711 | 0.52776 | 0.024 |
| C14  | 4e | 1 | 0.70976  | 0.36873 | 0.55096 |       |
| H14  | 4e | 1 | 0.77390  | 0.34823 | 0.60901 | 0.026 |
| C15  | 4e | 1 | 0.57770  | 0.31113 | 0.51504 |       |
| H15  | 4e | 1 | 0.54901  | 0.25212 | 0.54919 | 0.024 |
| C16  | 4e | 1 | 0.48387  | 0.33864 | 0.42777 |       |
| C17  | 4e | 1 | 0.34712  | 0.27993 | 0.38966 |       |
| H17  | 4e | 1 | 0.32097  | 0.21731 | 0.42119 | 0.023 |
| C18  | 4e | 1 | 0.25267  | 0.31239 | 0.30819 |       |
| H18  | 4e | 1 | 0.15951  | 0.27342 | 0.28533 | 0.022 |
| C19  | 4e | 1 | 0.28833  | 0.40233 | 0.25618 |       |
| C20  | 4e | 1 | 0.43103  | 0.45380 | 0.28675 |       |
| C21  | 4e | 1 | 0.16561  | 0.44119 | 0.17301 |       |
| H21A | 4e | 1 | 0.17719  | 0.39893 | 0.11901 | 0.019 |
| H21B | 4e | 1 | 0.18325  | 0.52146 | 0.16237 | 0.019 |
| C22  | 4e | 1 | 0.00073  | 0.42776 | 0.17854 |       |
| H22  | 4e | 1 | -0.02187 | 0.34588 | 0.18119 | 0.021 |

|      |    |   |          |         |         |       |
|------|----|---|----------|---------|---------|-------|
| C23  | 4e | 1 | -0.10706 | 0.47747 | 0.09259 |       |
| H23A | 4e | 1 | -0.21230 | 0.46664 | 0.09500 | 0.032 |
| H23B | 4e | 1 | -0.09150 | 0.43975 | 0.03831 | 0.032 |
| H23C | 4e | 1 | -0.08651 | 0.55789 | 0.08933 | 0.032 |
| C24  | 4e | 1 | -0.02488 | 0.48441 | 0.26320 |       |
| H24A | 4e | 1 | 0.00331  | 0.56382 | 0.26353 | 0.037 |
| H24B | 4e | 1 | 0.03779  | 0.44769 | 0.31823 | 0.037 |
| H24C | 4e | 1 | -0.13225 | 0.47822 | 0.26236 | 0.037 |

### Anisotropic displacement parameters, in Å<sup>2</sup>

| Atom | U <sub>11</sub> | U <sub>22</sub> | U <sub>33</sub> | U <sub>12</sub> | U <sub>13</sub> | U <sub>23</sub> |
|------|-----------------|-----------------|-----------------|-----------------|-----------------|-----------------|
| C1   | 0.01366         | 0.01311         | 0.01806         | 0.00252         | 0.00641         | -0.00184        |
| C2   | 0.01252         | 0.01238         | 0.01713         | 0.00362         | 0.00446         | -0.00026        |
| C3   | 0.01408         | 0.01750         | 0.01720         | 0.00149         | 0.00323         | -0.00037        |
| C4   | 0.01945         | 0.02417         | 0.01548         | 0.00413         | 0.00475         | 0.00390         |
| C5   | 0.02103         | 0.01909         | 0.02322         | 0.00212         | 0.01035         | 0.00520         |
| C6   | 0.01602         | 0.01591         | 0.02238         | 0.00202         | 0.00884         | -0.00041        |
| C7   | 0.02134         | 0.01670         | 0.02835         | -0.00287        | 0.01250         | -0.00186        |
| C8   | 0.02016         | 0.02156         | 0.02828         | -0.00758        | 0.01079         | -0.00946        |
| C9   | 0.01889         | 0.02358         | 0.01785         | -0.00248        | 0.00547         | -0.00643        |
| C10  | 0.01376         | 0.01661         | 0.01704         | 0.00147         | 0.00662         | -0.00413        |
| C11  | 0.01453         | 0.01323         | 0.01510         | 0.00320         | 0.00566         | -0.00155        |
| C12  | 0.01562         | 0.01683         | 0.01447         | 0.00271         | 0.00518         | -0.00339        |
| C13  | 0.01801         | 0.02304         | 0.01758         | 0.00167         | 0.00251         | -0.00413        |
| C14  | 0.02400         | 0.02475         | 0.01446         | 0.00694         | 0.00207         | 0.00144         |
| C15  | 0.02473         | 0.01890         | 0.01826         | 0.00530         | 0.00741         | 0.00372         |
| C16  | 0.01834         | 0.01528         | 0.01846         | 0.00430         | 0.00714         | 0.00093         |
| C17  | 0.02162         | 0.01463         | 0.02350         | 0.00068         | 0.00900         | 0.00439         |
| C18  | 0.01543         | 0.01607         | 0.02323         | -0.00166        | 0.00474         | -0.00016        |
| C19  | 0.01521         | 0.01323         | 0.01615         | 0.00217         | 0.00492         | -0.00168        |
| C20  | 0.01340         | 0.01201         | 0.01524         | 0.00233         | 0.00382         | -0.00193        |
| C21  | 0.01437         | 0.01544         | 0.01600         | -0.00082        | 0.00238         | -0.00130        |



|     |         |         |         |          |         |          |
|-----|---------|---------|---------|----------|---------|----------|
| C22 | 0.01427 | 0.01843 | 0.01779 | -0.00030 | 0.00237 | -0.00222 |
| C23 | 0.01575 | 0.02393 | 0.02213 | 0.00027  | 0.00098 | -0.00080 |
| C24 | 0.02020 | 0.03252 | 0.02146 | 0.00500  | 0.00437 | -0.00657 |

## 8. DSC of 2a:2d and 2b:2d mixtures

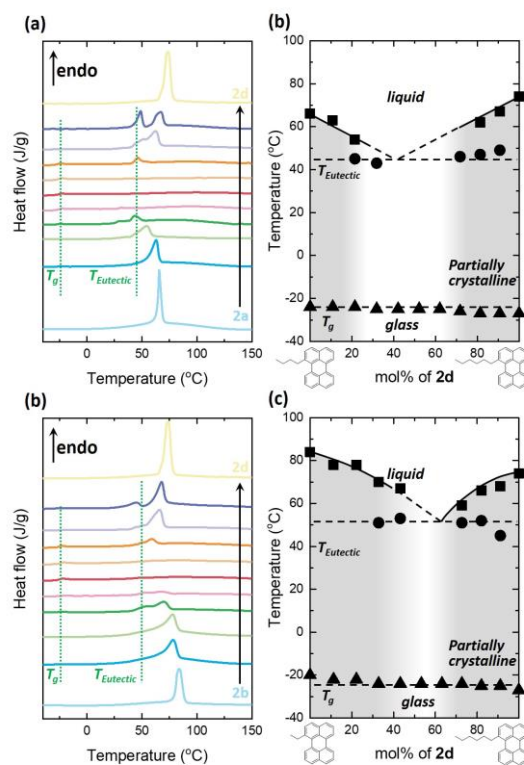

**Figure S32.** DSC thermogram representing the initial heating half-cycle for blends of **2a:2d** (a) and **2b:2d** (c). Glass transition ( $T_g$ ) and eutectic transition ( $T_{eutectic}$ ) temperatures are marked by vertical dotted lines. Schematic showing a phase diagram for blends of **2a:2d** (b) and **2b:2d** (d). The liquidus (solid lines) are sketched following the melting temperature (squares) of each blend. The glass transition and eutectic transition (dashed lines) are sketched following the enthalpy relaxation peak of glass transition (triangles) and the peak temperature for the eutectic point (circles), respectively. The lightly dotted area indicates the region where the blend remains liquid.

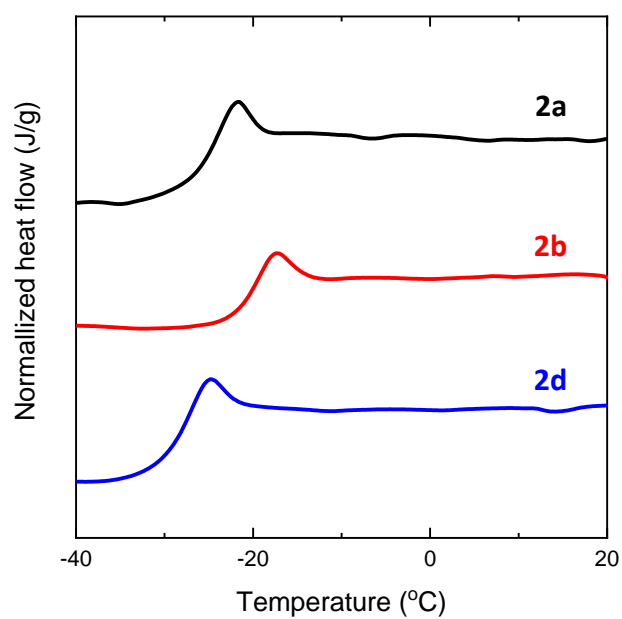

**Figure S33.** DSC thermogram representing the second heating cycle of the neat materials (**2a**, **2b** and **2d**) collected from solution cast from DCM after kept at -50 °C for 30 min, highlighting the  $T_g$  of the three neat materials. The heat flow is normalized to the total sample weight.

**Table S3:** Measured melting points using DSC.

| Entry | onset | peak | offset |
|-------|-------|------|--------|
| 1     | 276   | 278  | 281    |
| 2a    | 63    | 70   | 74     |
| 2b    | 78    | 82   | 86     |
| 2c    | 114   | 117  | 120    |
| 2d    | 66    | 71   | 75     |
| 2e    | 50    | 56   | 61     |
| 2f    | 116   | 121  | 126    |
| 2g    | 127   | 131  | 134    |
| 2h    | 217   | 222  | 225    |
| 2i    | 321   | 341  | 360    |
| 2j    | 130   | 146  | 150    |

## 9. References

1. H. E. Zieger, *J. Org. Chem.* 1966, **31**, 2977.
2. M. Strauch, PhD Thesis, Göttingen, Georg-August-Universität (Germany) Synthesen und photophysikalische Untersuchungen von Derivaten des Perylens, 1990.
3. C. Zimmermann, F. Willig, S. Ramakrishna, B. Burfeindt, B. Pettinger, R. Eichberger, W. Storck, *J. Phys. Chem. B* 2001, **105**, 9245.
4. O. V. Dolomanov, R. J. Bourhis, J. A. K. Gildea, H. Puschmann, *J. Appl. Cryst.* 2009, **42**, 339.
